# Supplementary material for: Convergent synthesis of degradable dendrons based on l-malic acid
Source: Royal Society of Chemistry journal article supplement (doi:10.1039/c4nj01156b), 2014-11-21

## Supporting Information

### Convergent Synthesis of Degradable Dendrons based on L-Malic acid

Ulrich Meyhoff,<sup>†</sup> Ulla Riber<sup>‡</sup> and Ulrik Boas<sup>‡,\*</sup>

<sup>†</sup>*Department of Chemistry, University of Copenhagen, Universitetsparken 5, DK-2100 Copenhagen, Denmark*

<sup>‡</sup>*Section of Immunology and Vaccinology, National Veterinary Institute, Technical University of Denmark (DTU), Bülowsvej 27, DK 1870 Frederiksberg C.*

\* *uboa@vet.dtu.dk*

### NMR and MS spectra and HPLC chromatograms on selected compounds

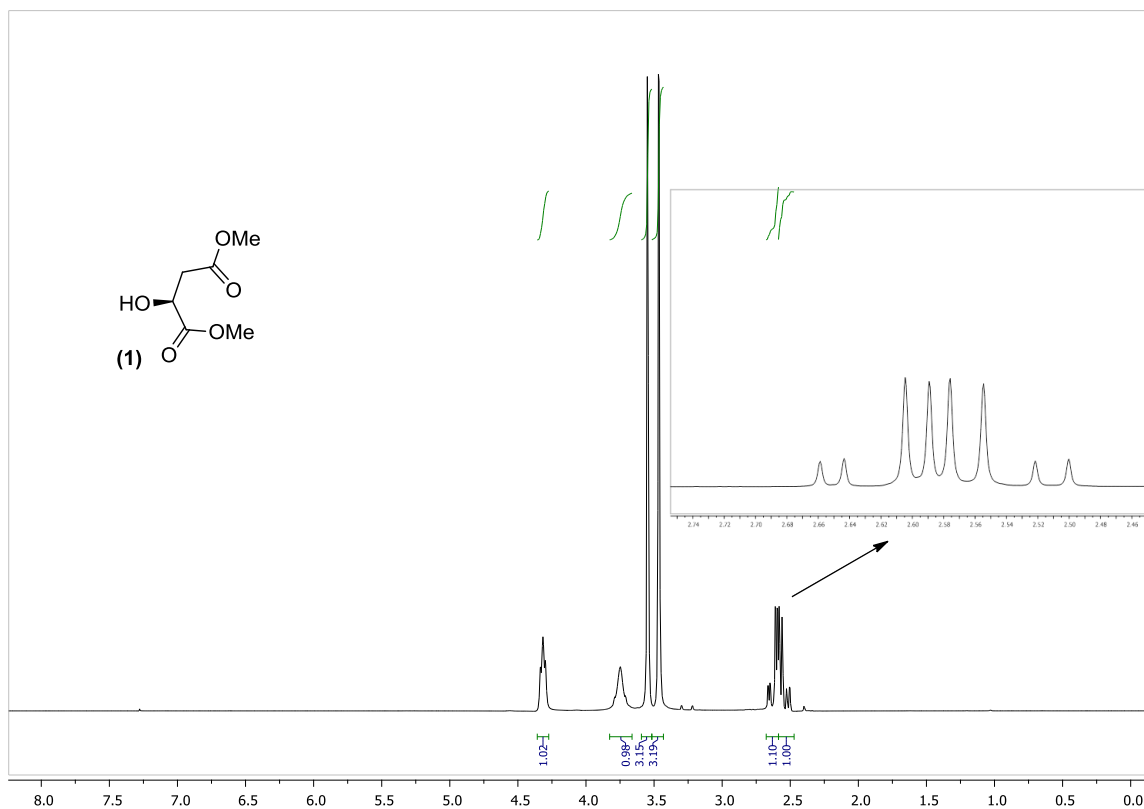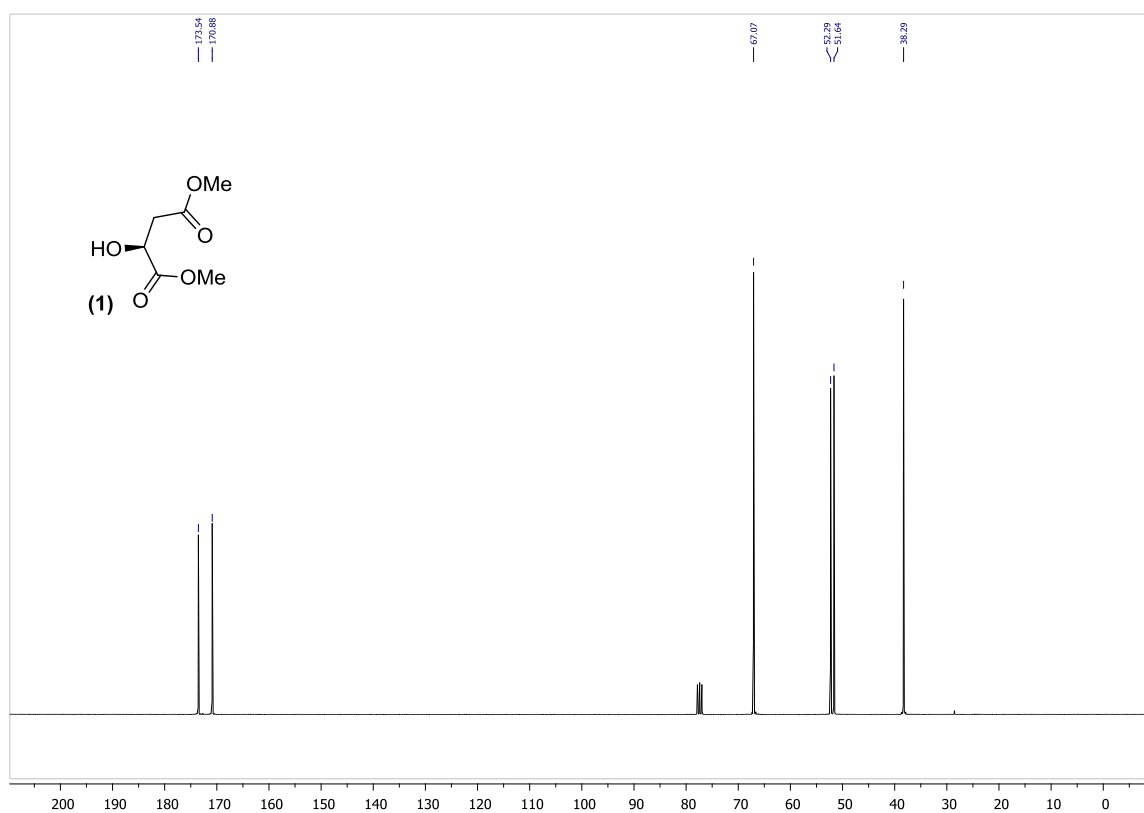

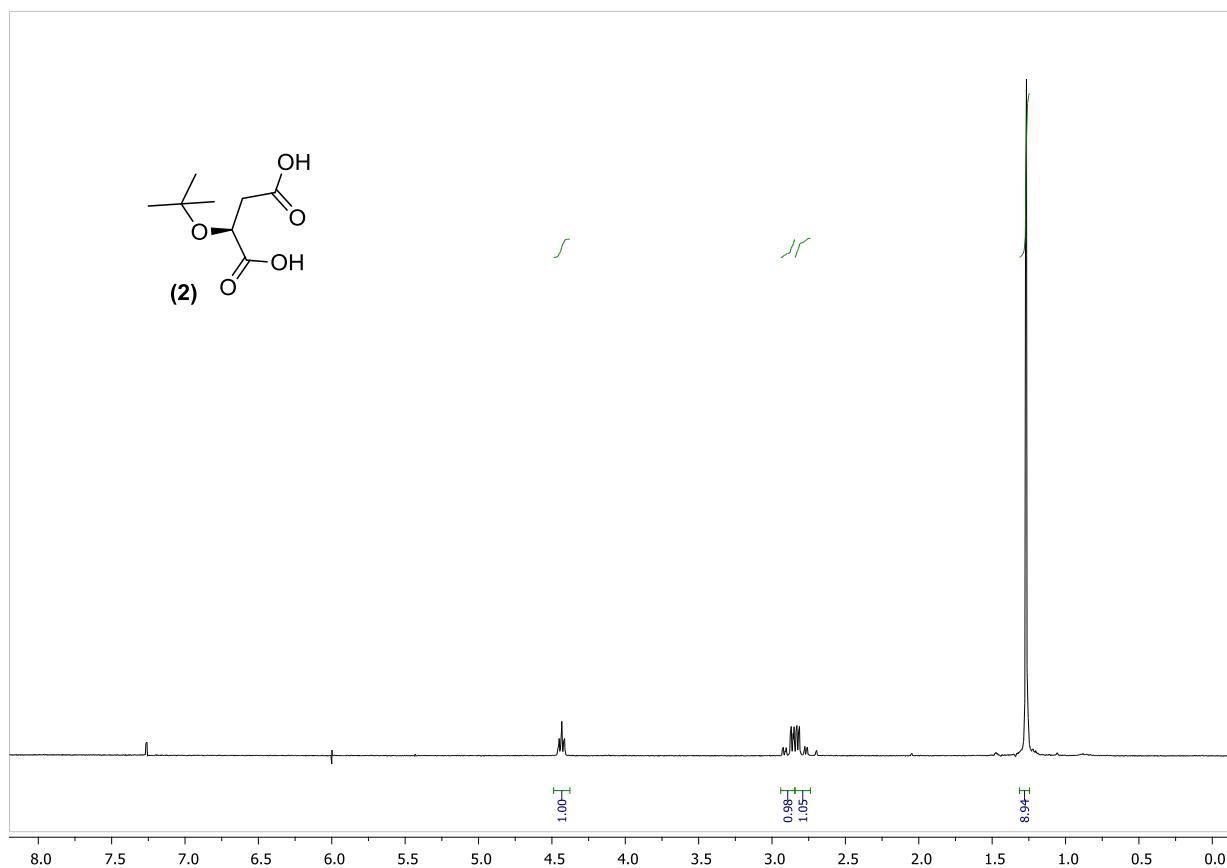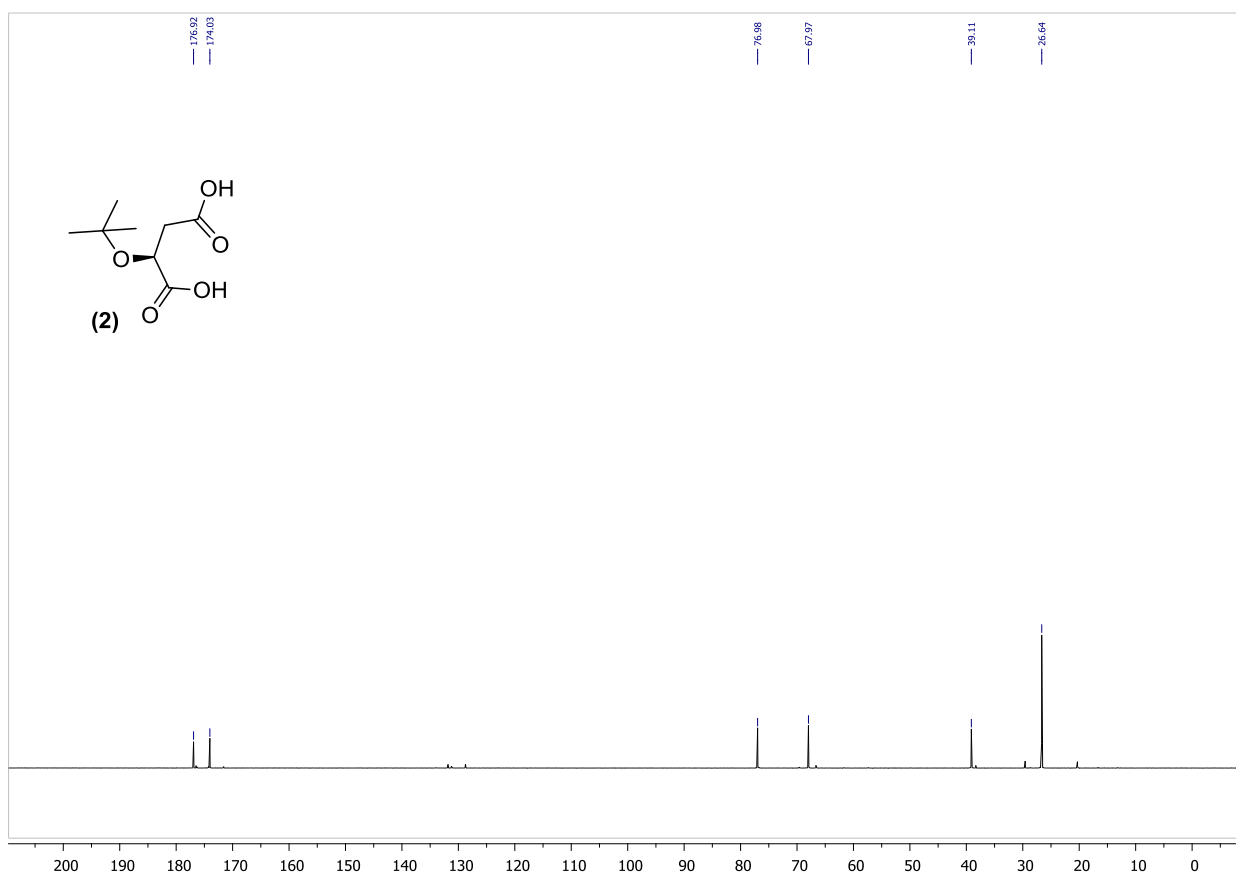

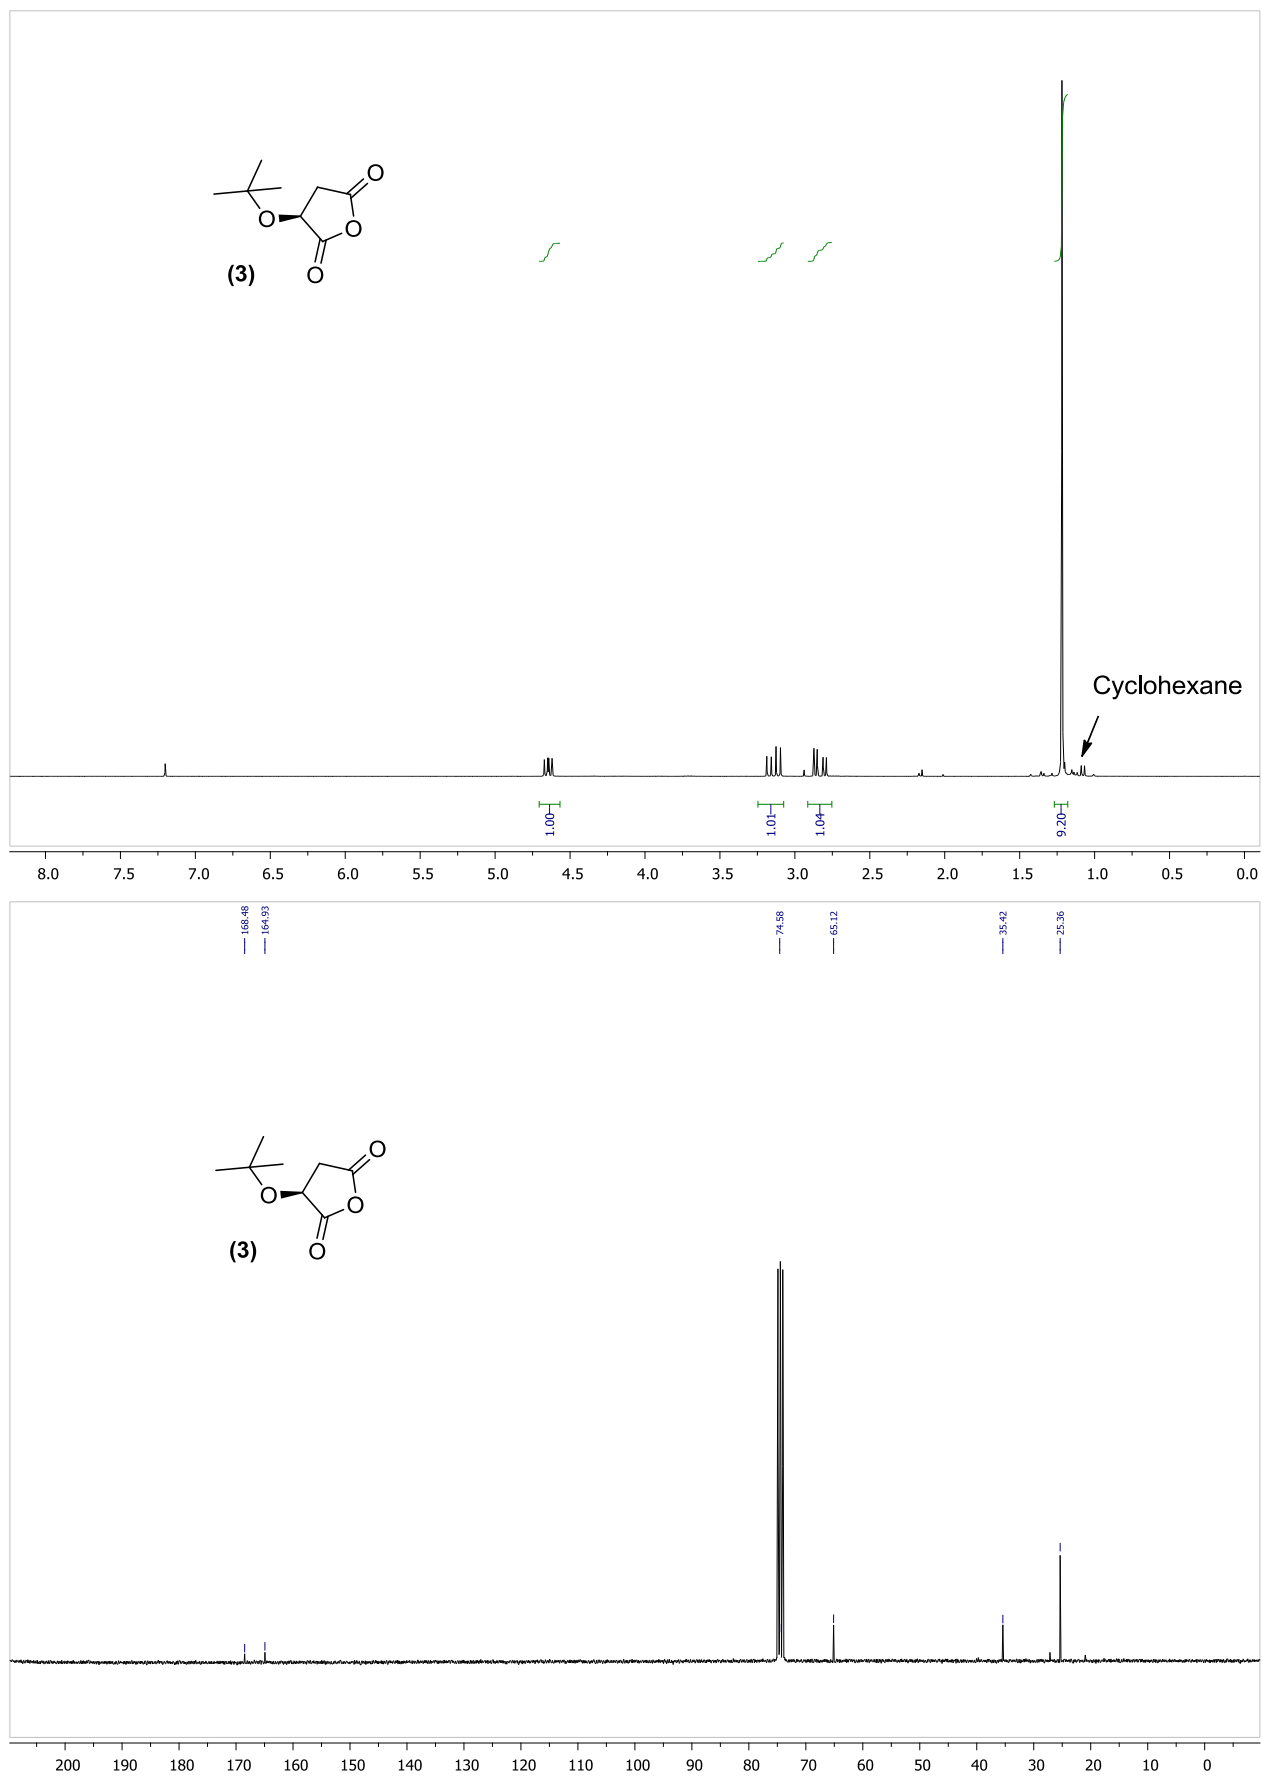

HPLC (reversed phase) of (3) hydrolyzed to the corresponding acid and MS (TOF ESI+) of (3)

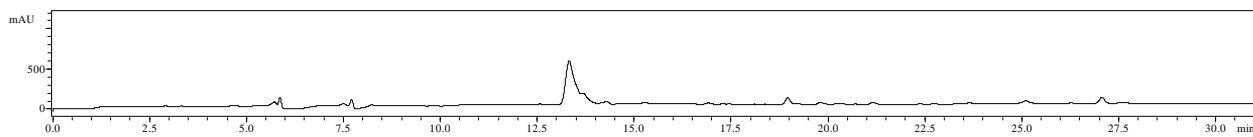

MS (TOF ESI+)

Opløst i MeOH. MS (TOF ESI+)  $m/z$  195  $[M+Na]^+$ , 227  $[M+MeOH+Na]^+$ .

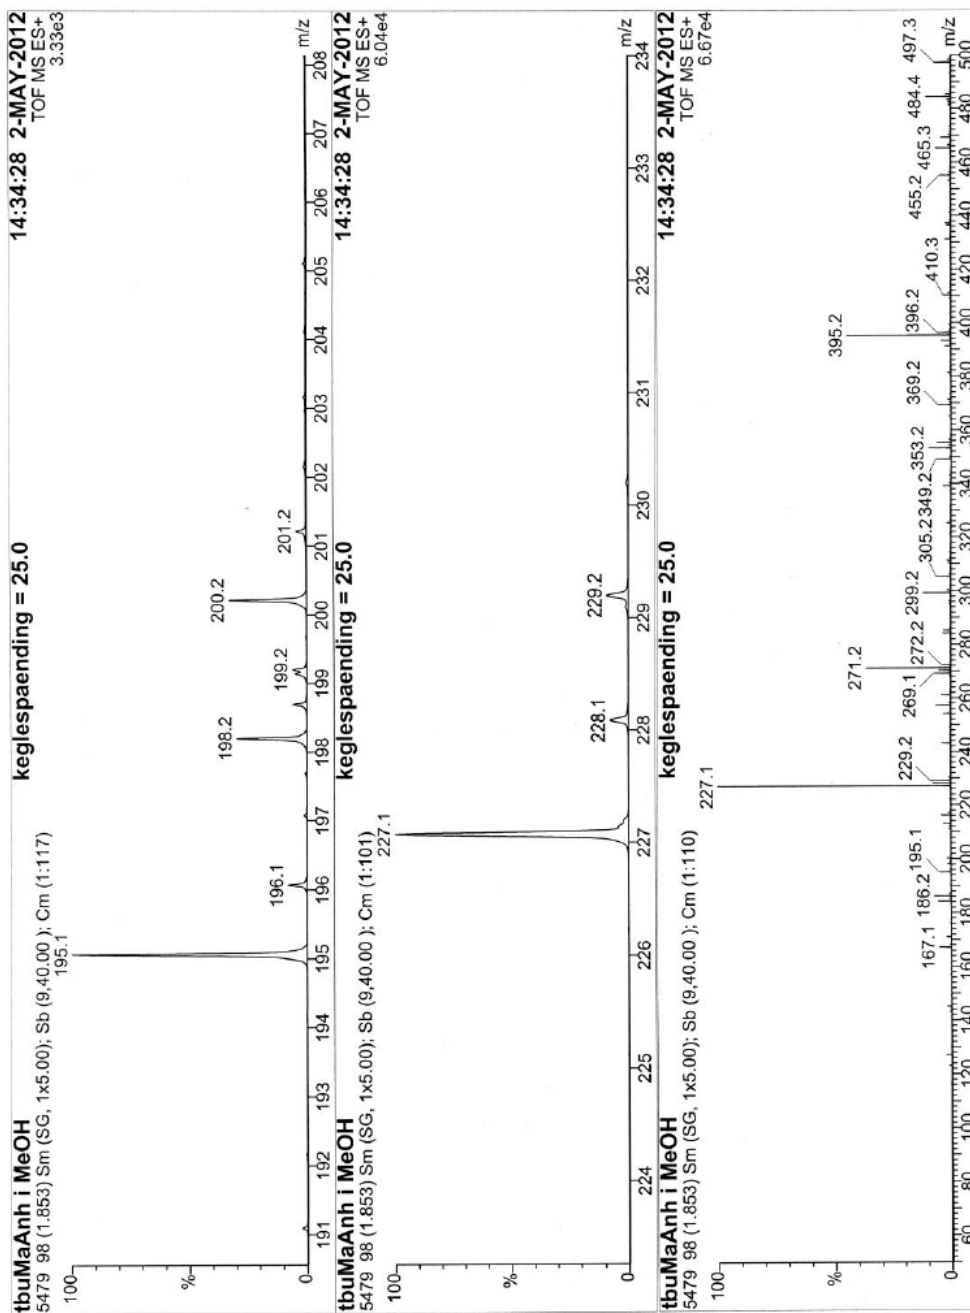

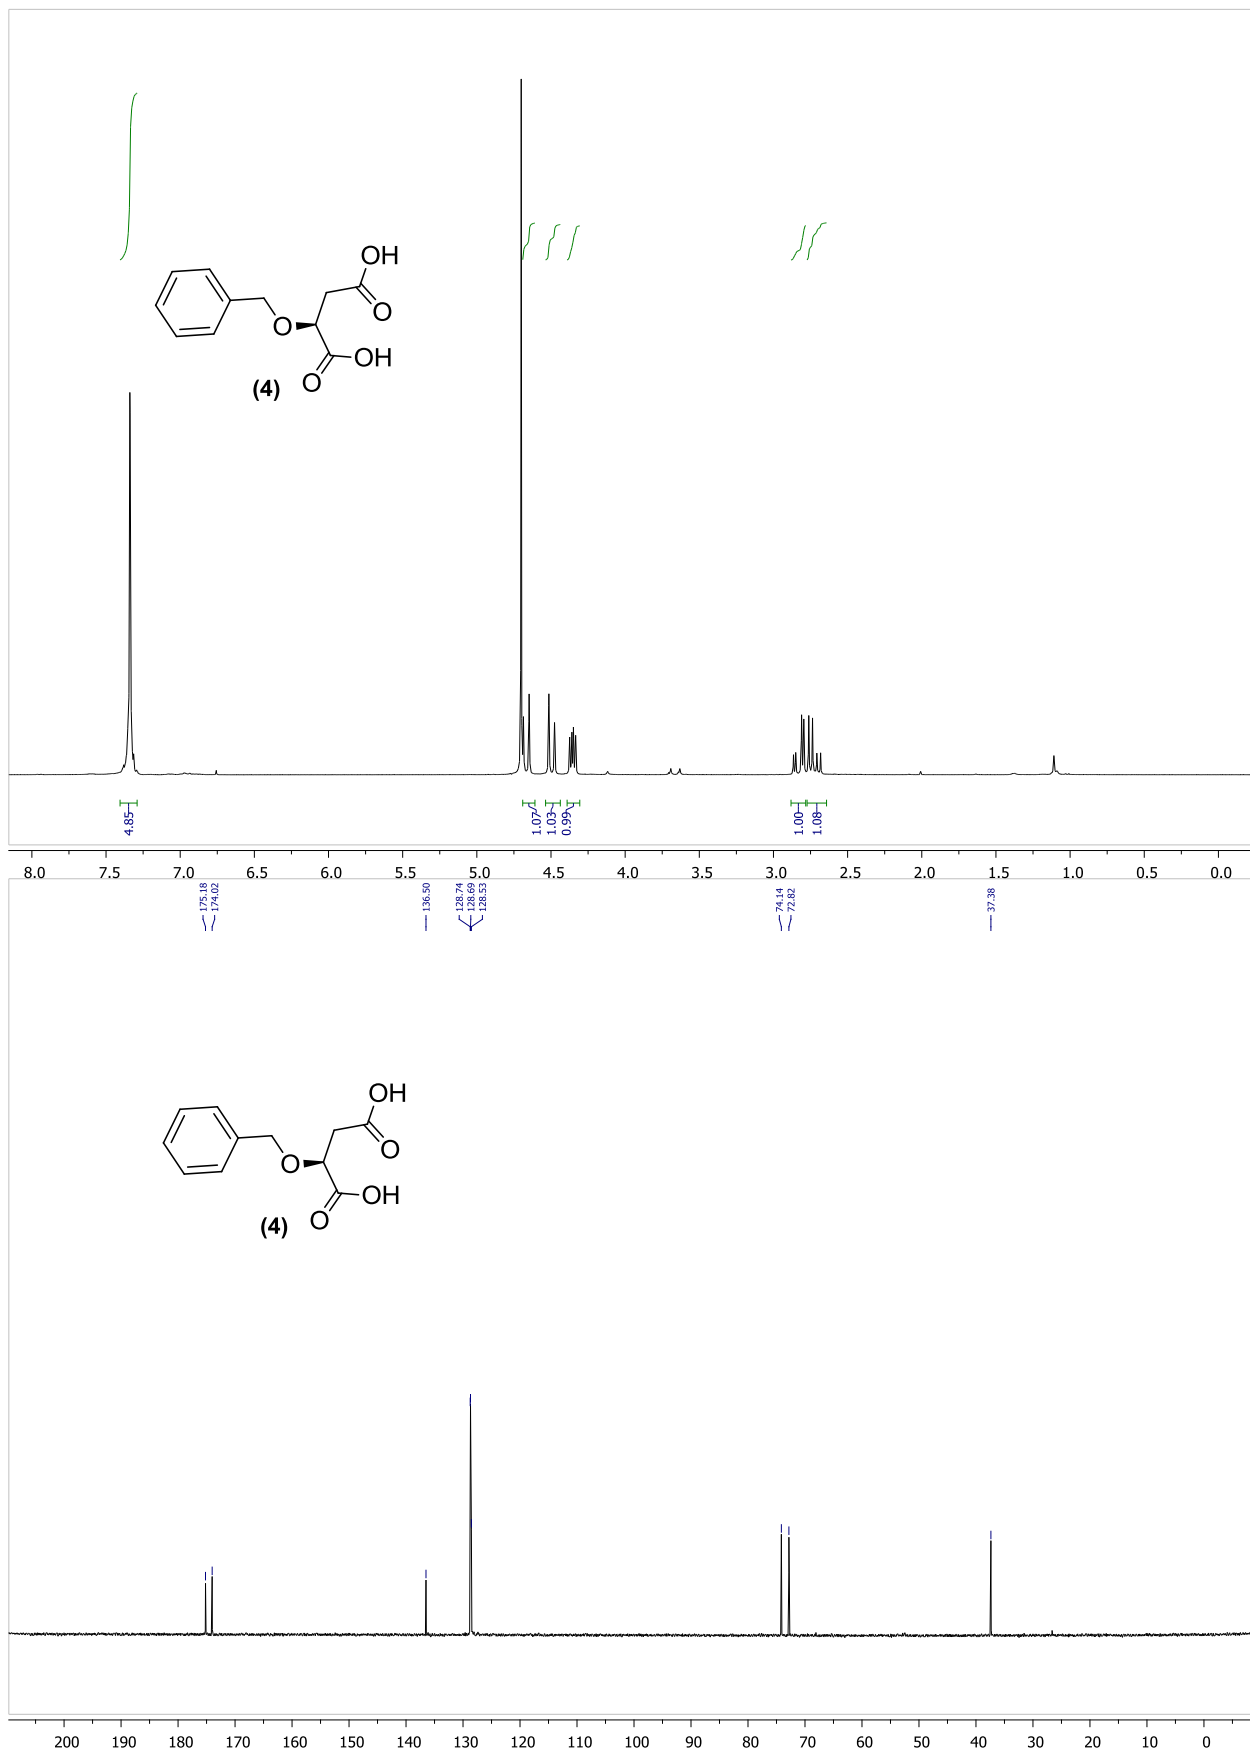

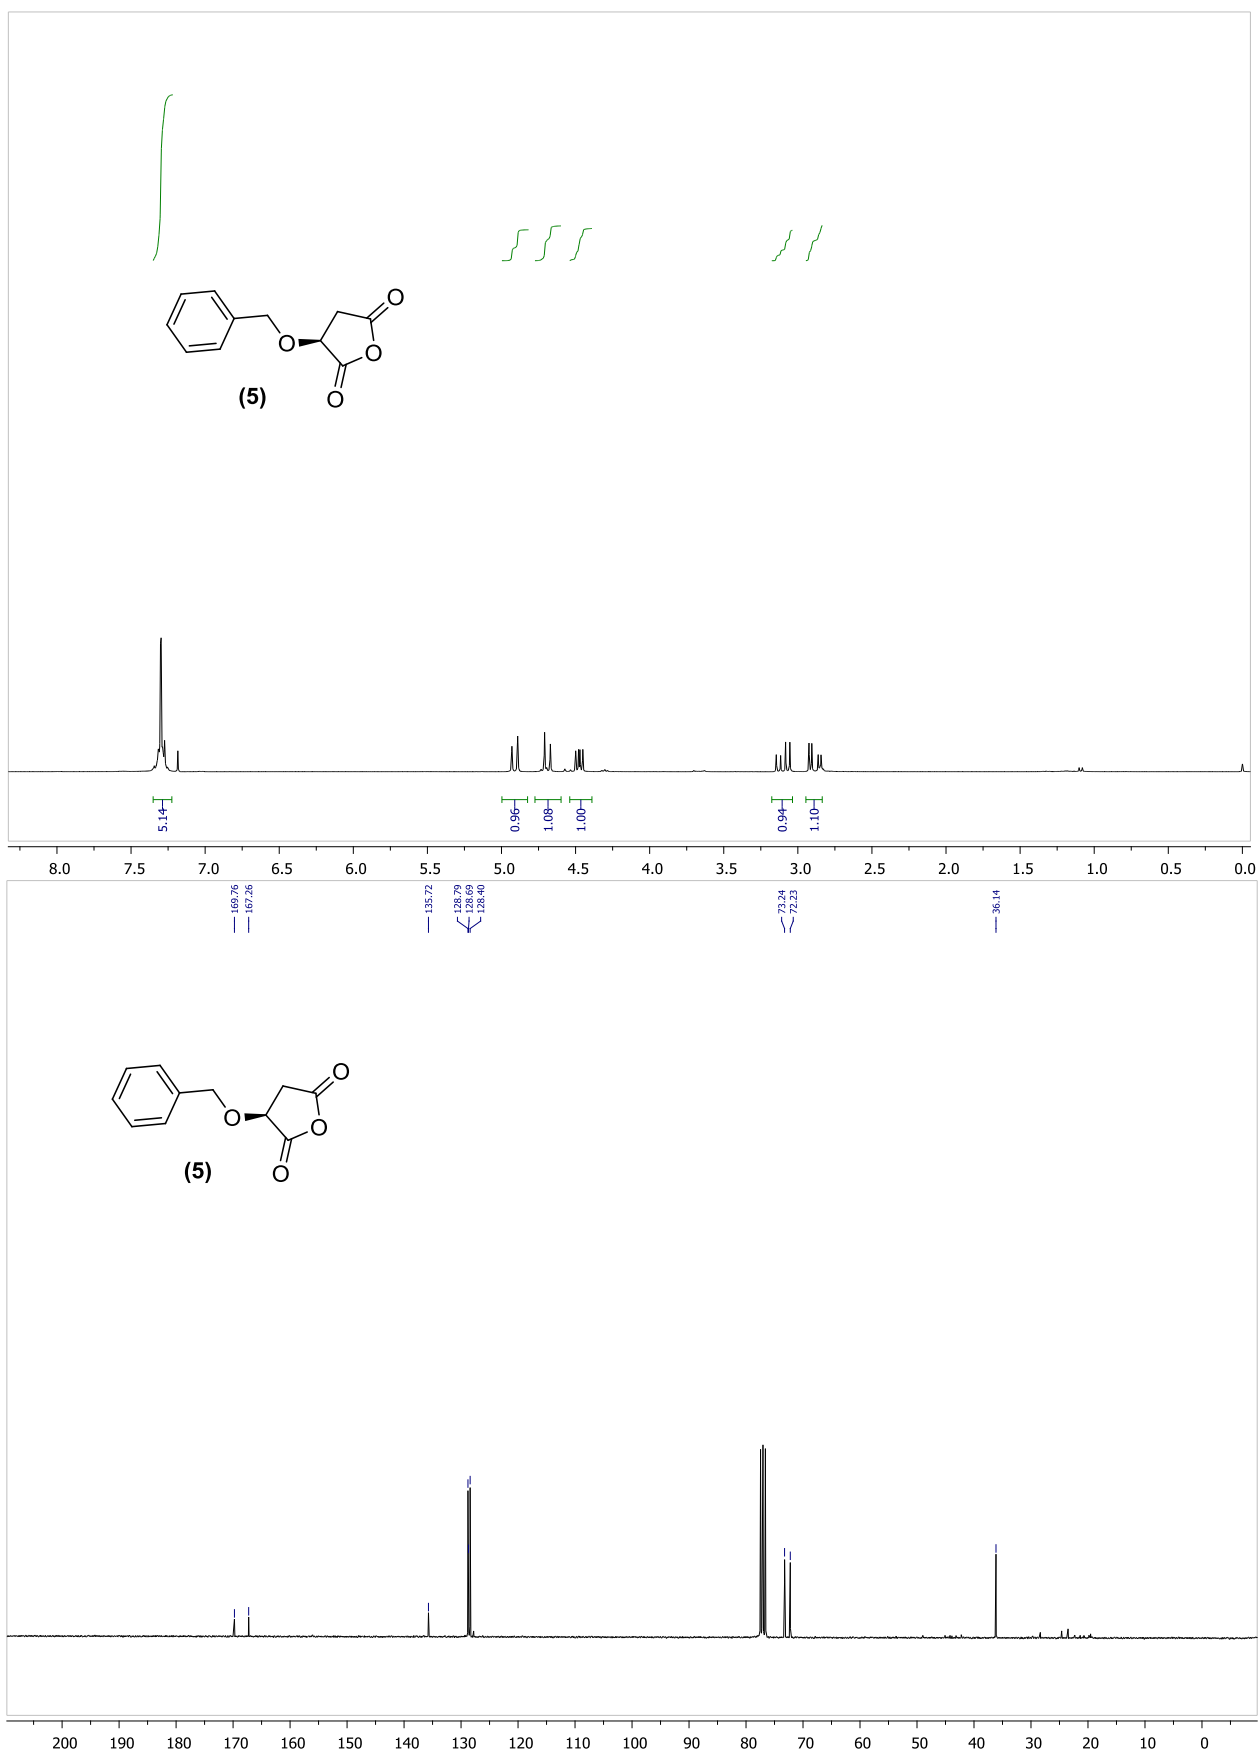

HPLC (reversed-phase) of (5) hydrolyzed to the corresponding acid and MS (TOF ESI+) of (5)

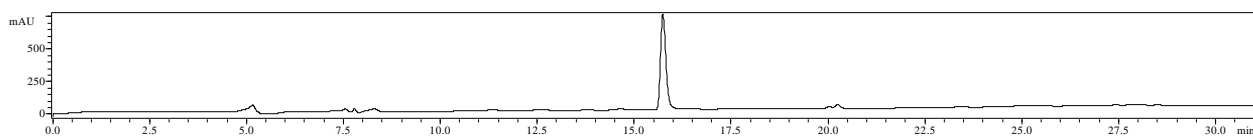

MS (TOF ESI+)

Opløst i MeOH. (TOF ESI<sup>+</sup>)  $m/z$  229 [M+Na]<sup>+</sup>, 261 [M+MeOH+Na]<sup>+</sup>.

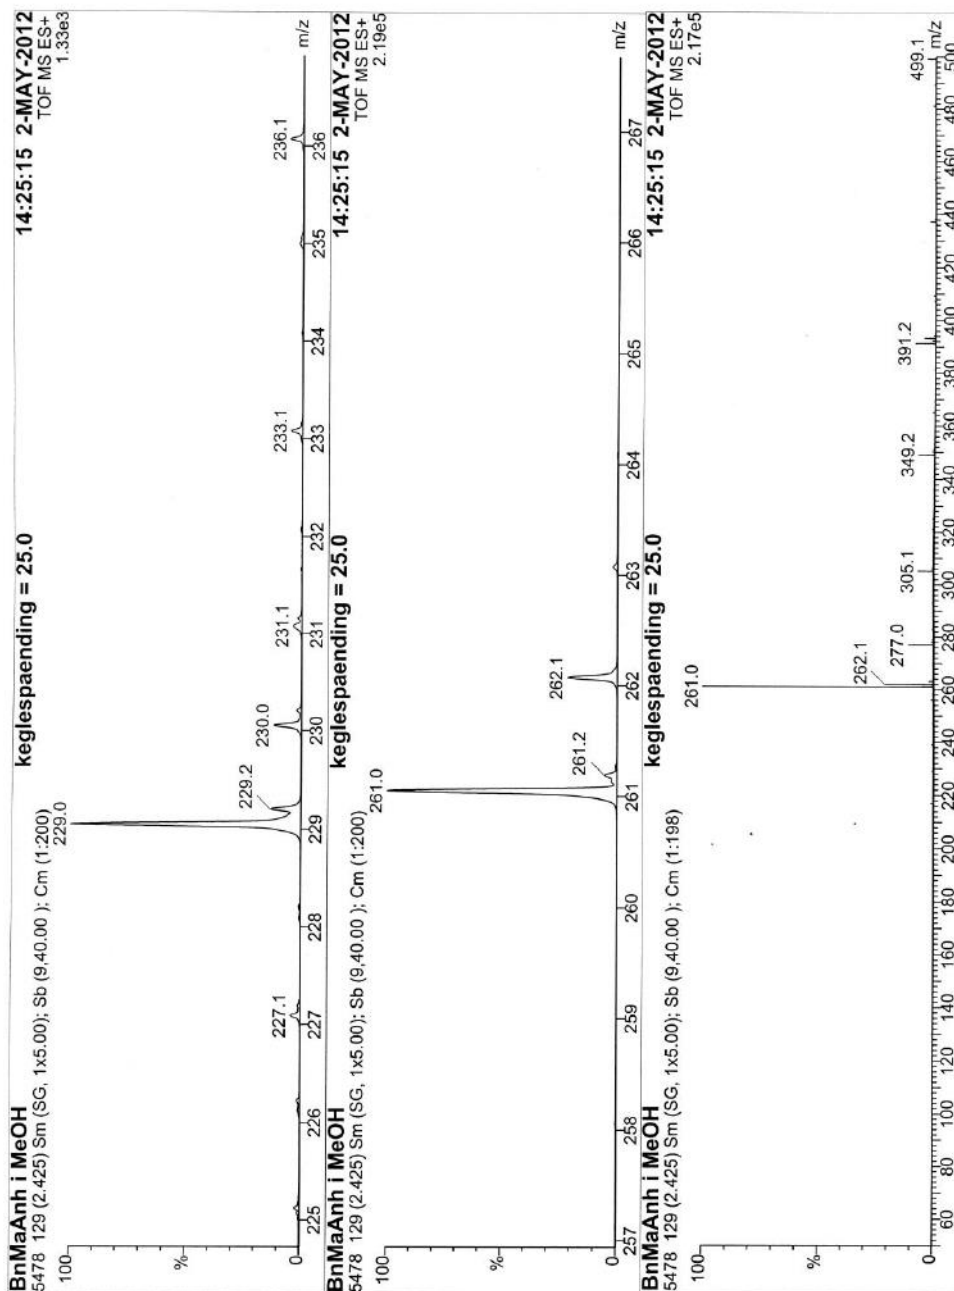



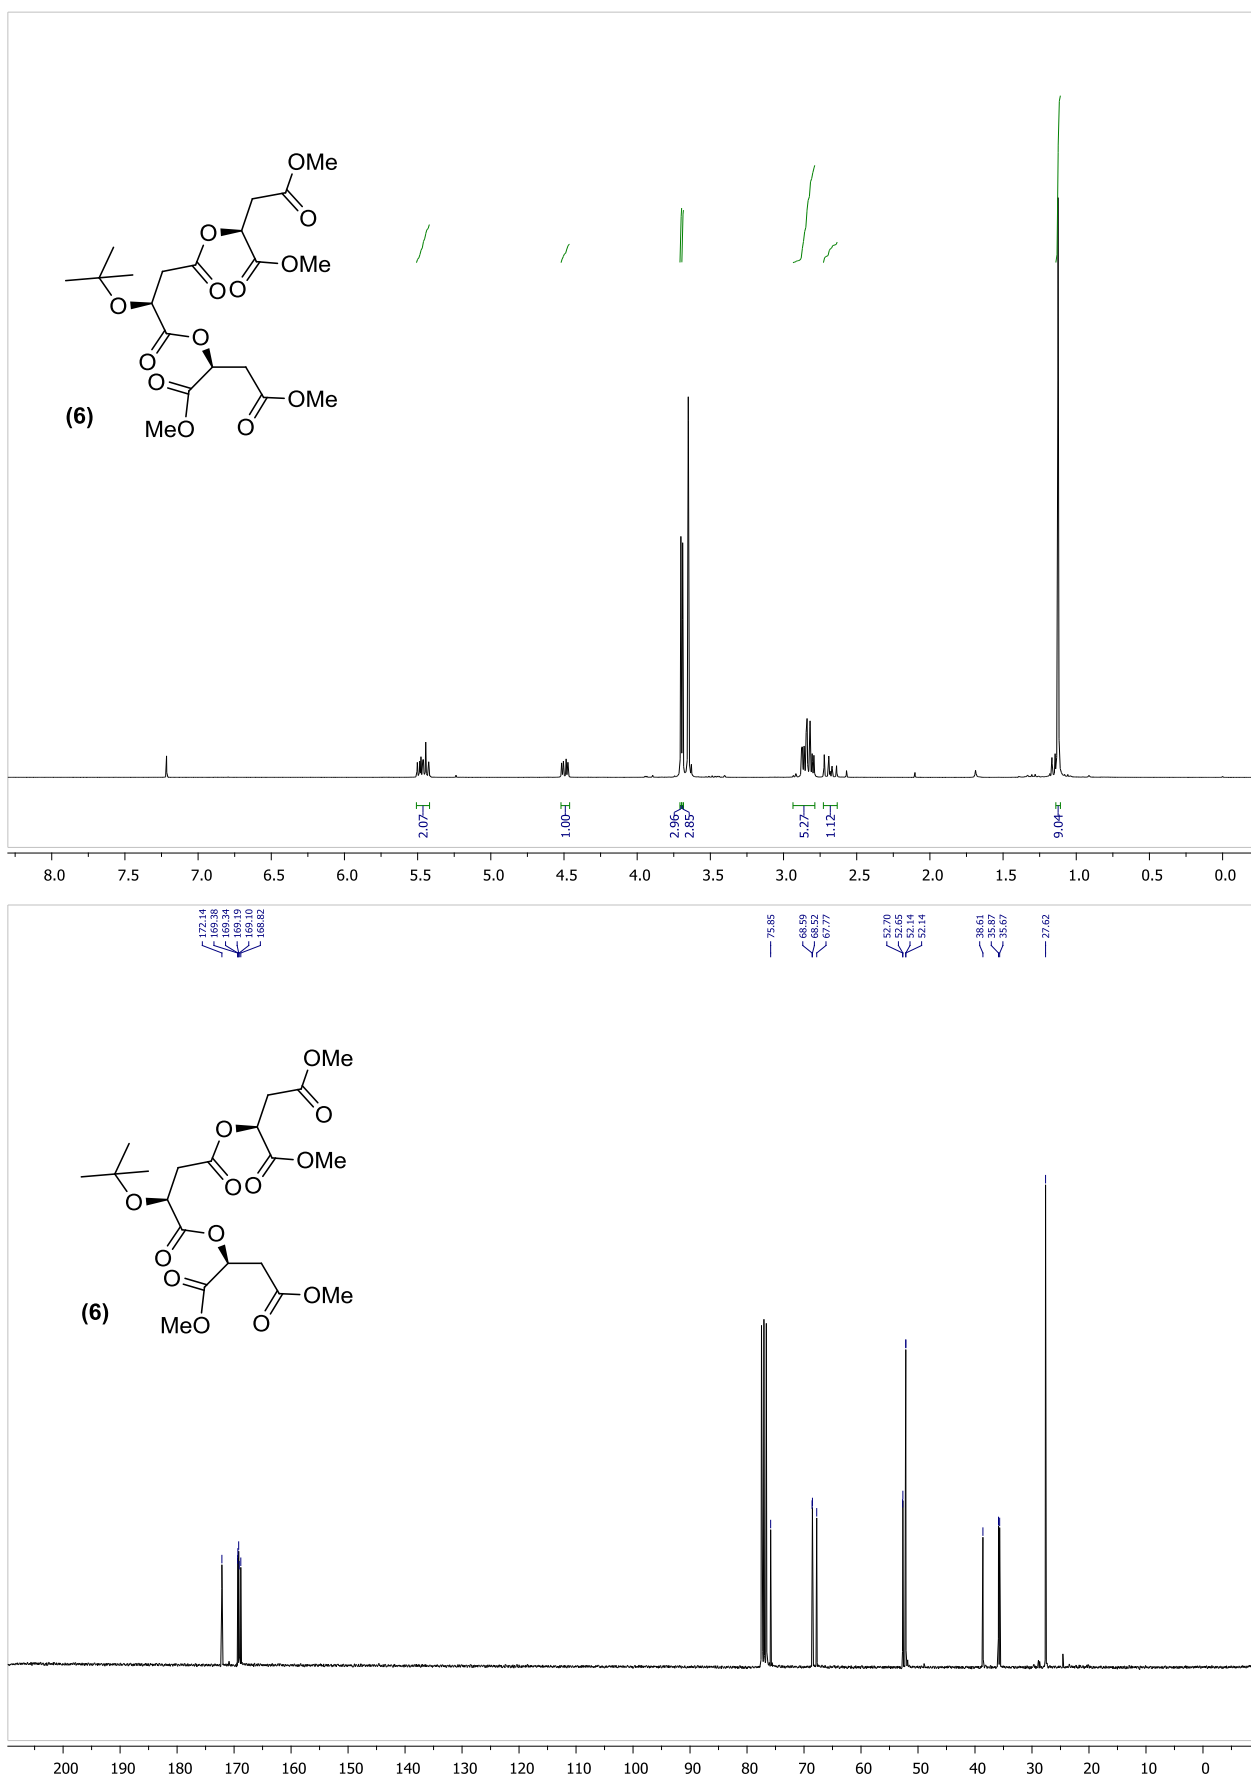

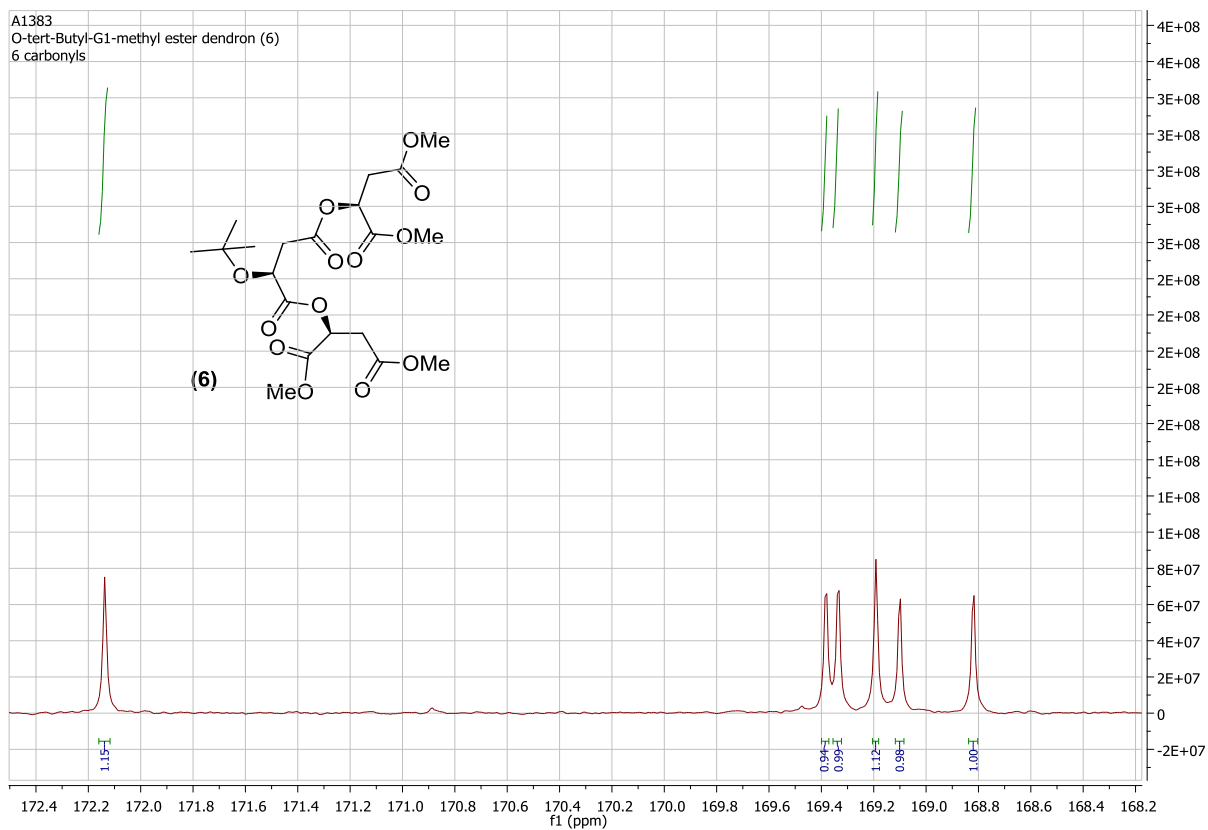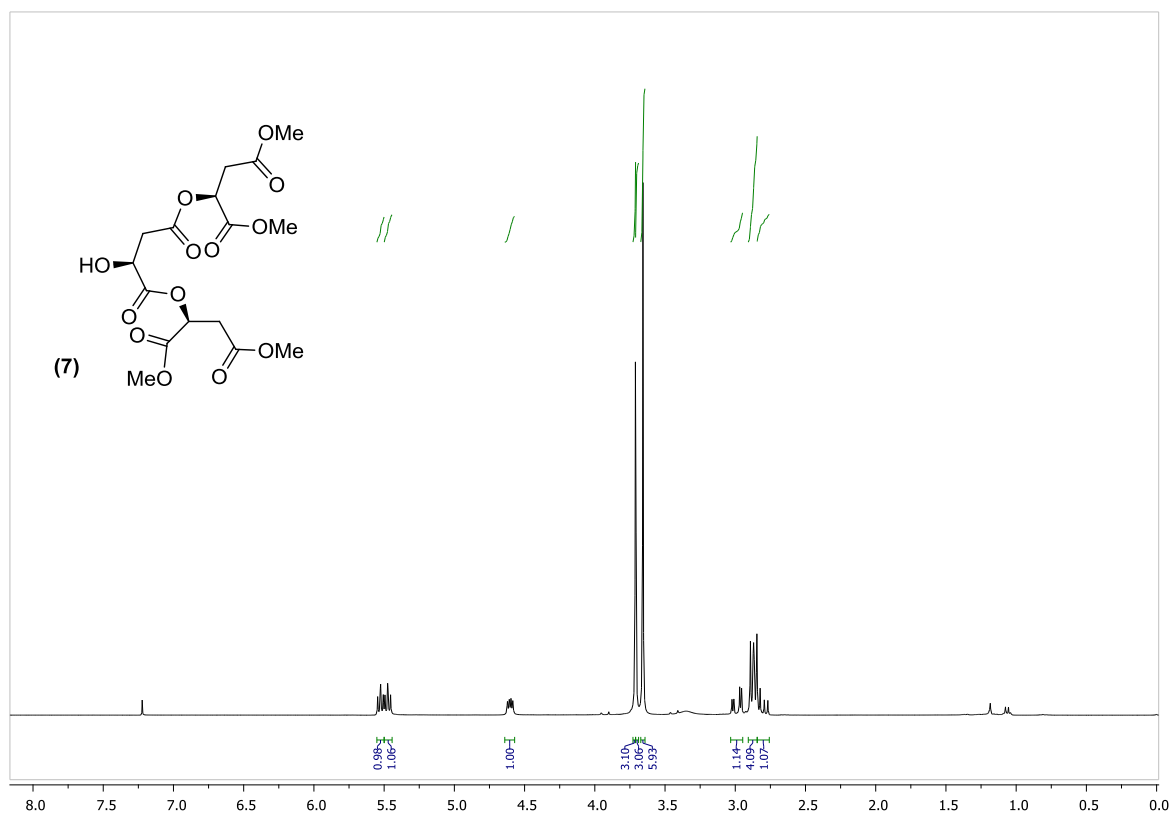

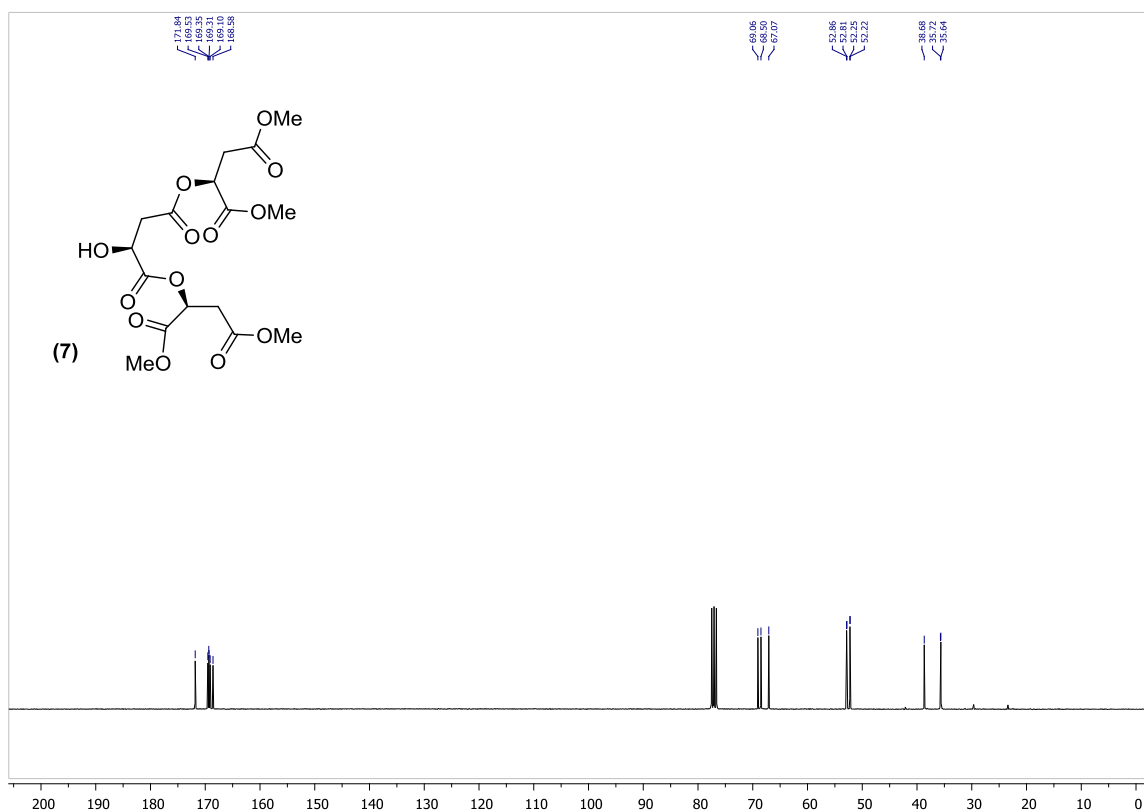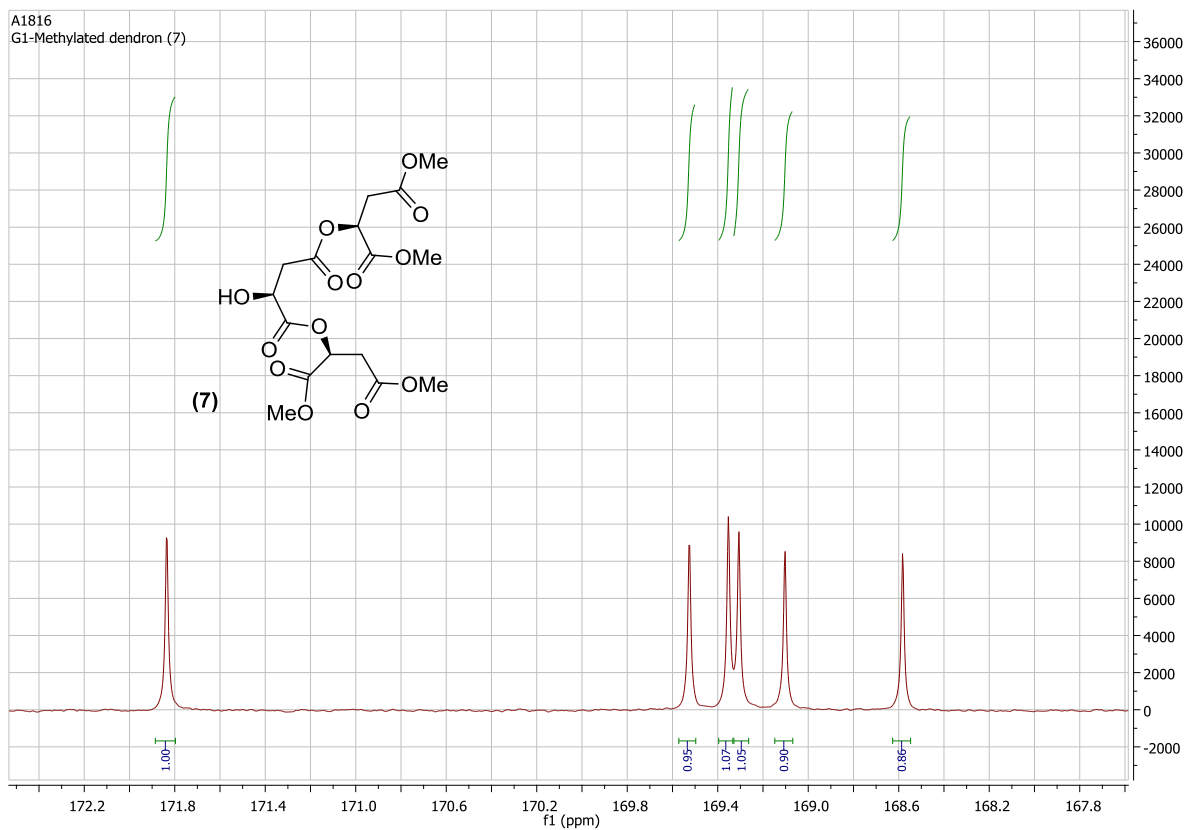

HPLC (reversed-phase) of (7)

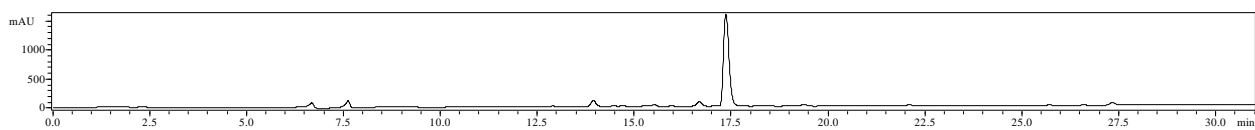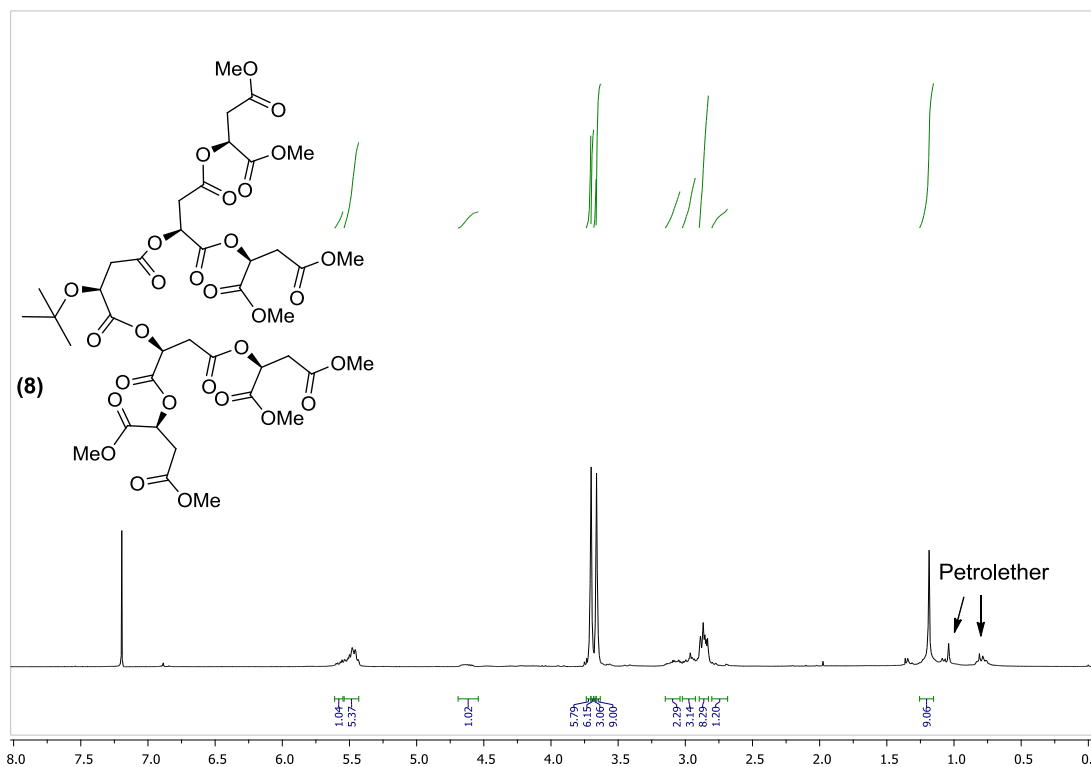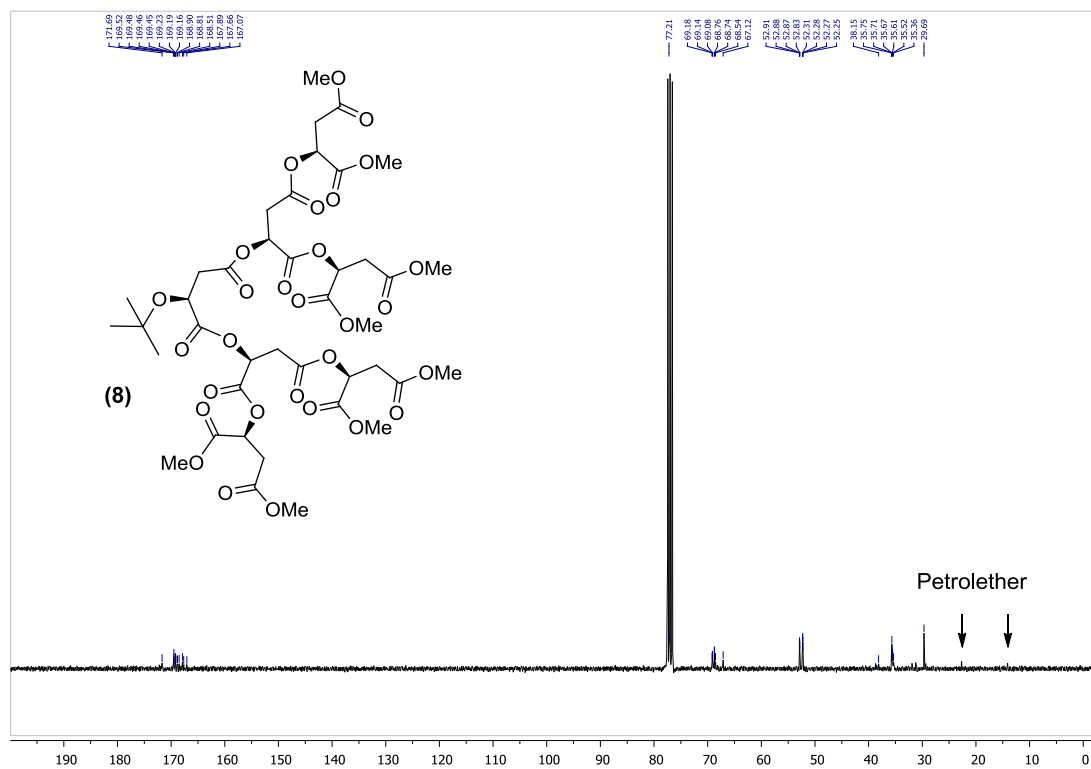

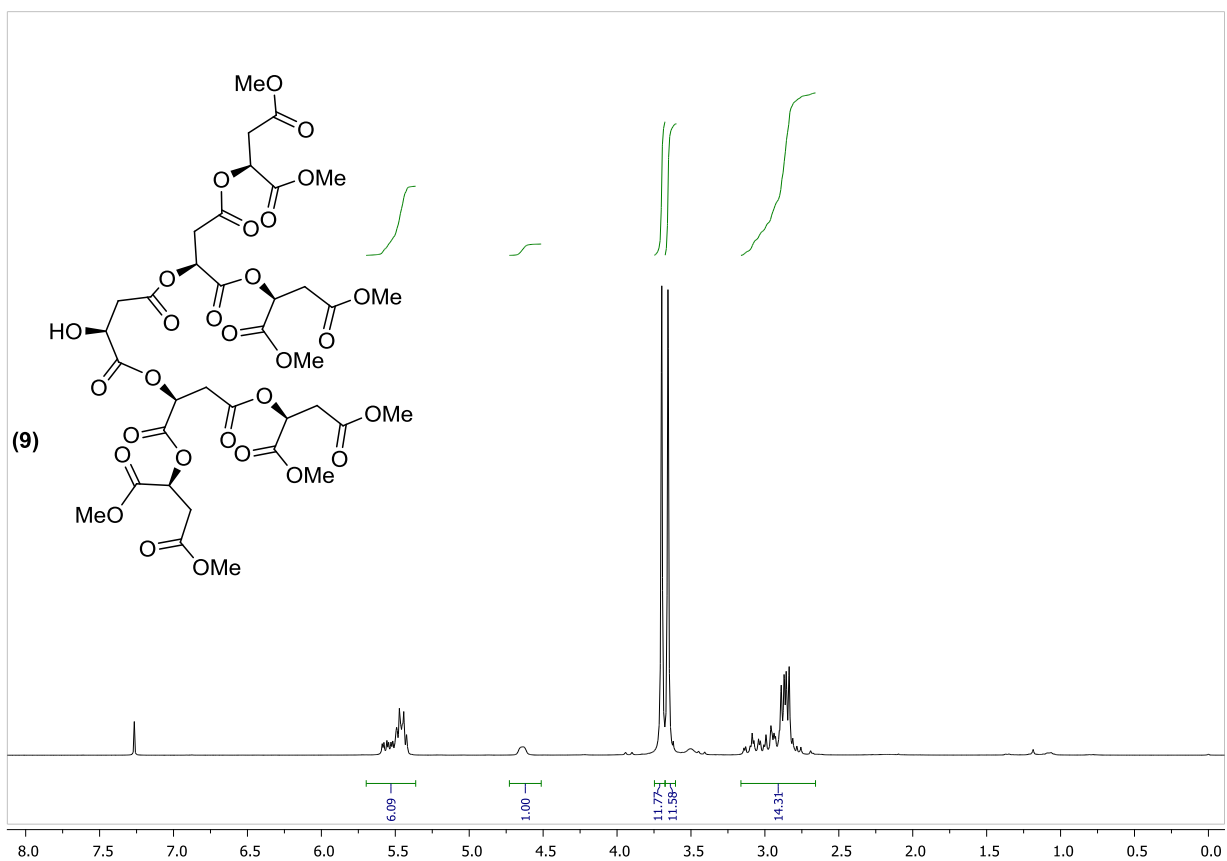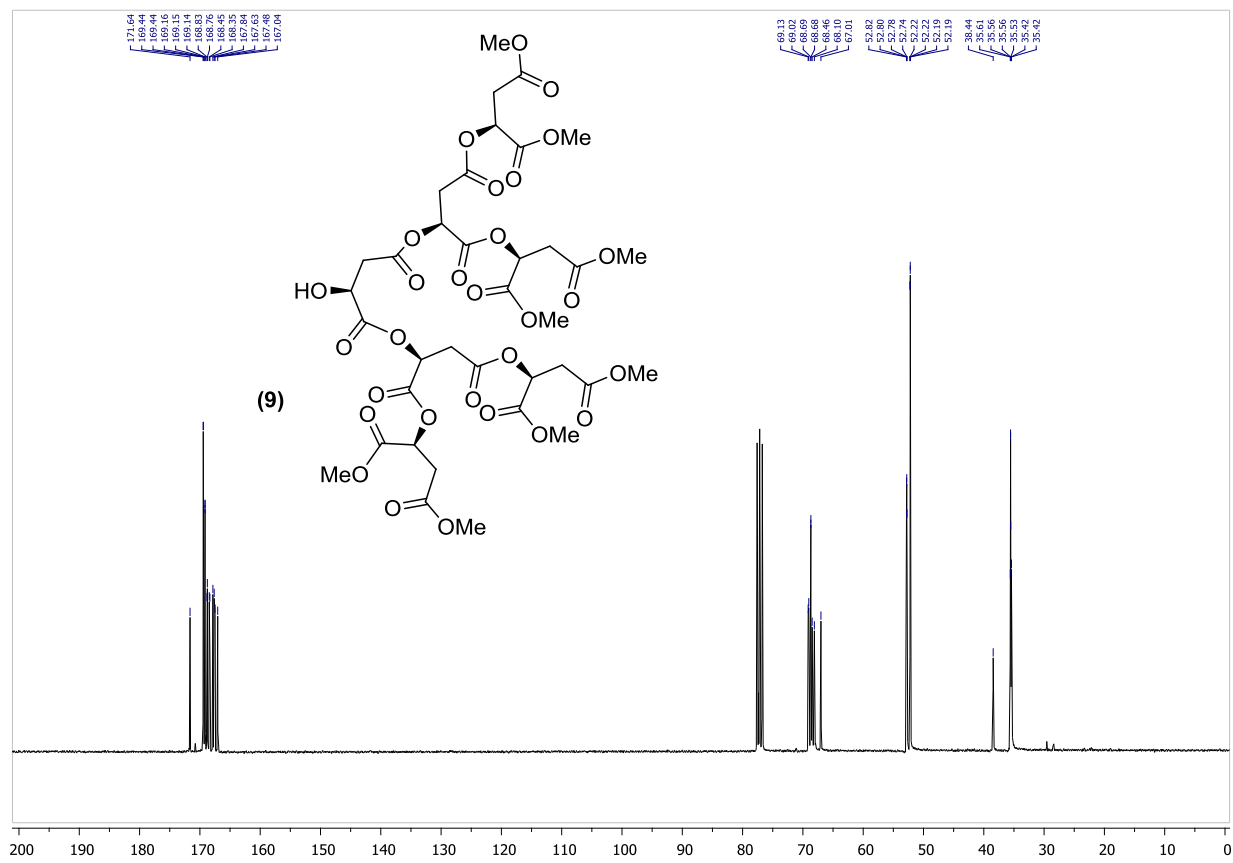

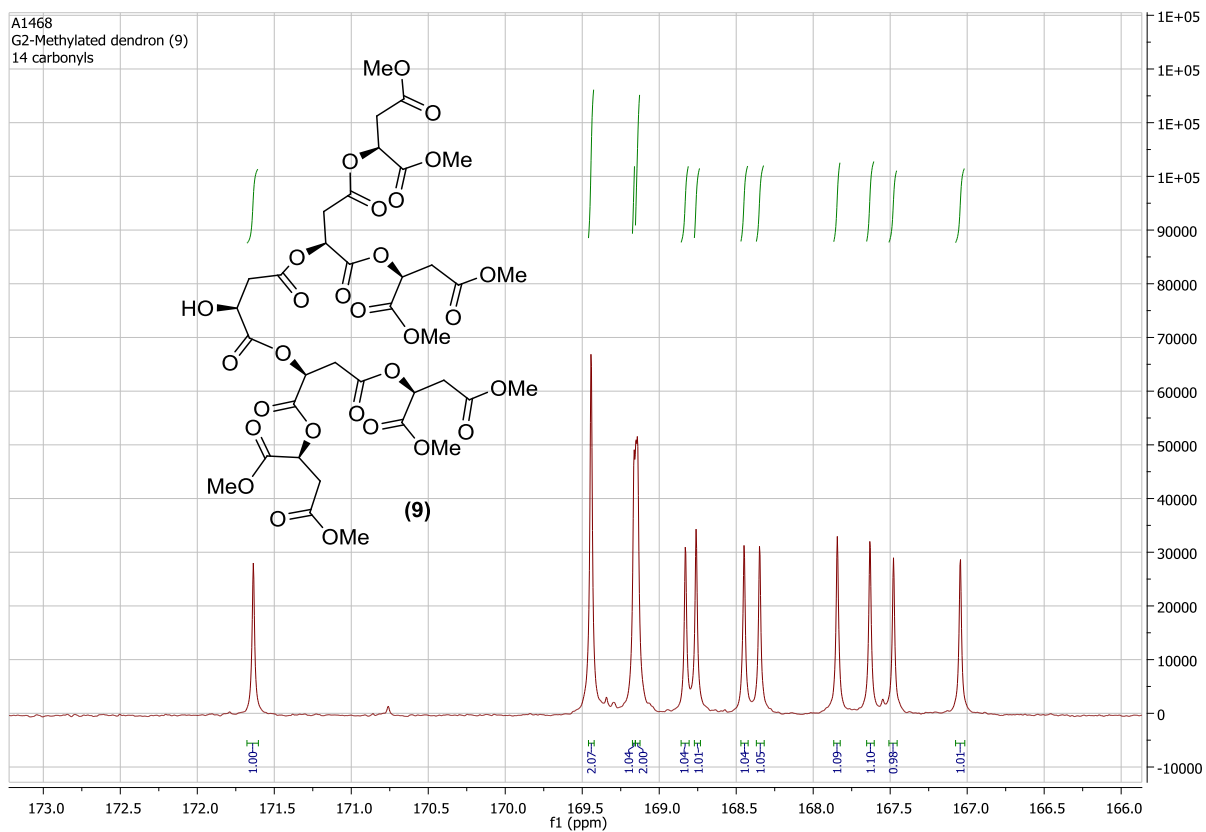

HPLC (reversed-phase) and MS (MALDI-TOF) of (9)

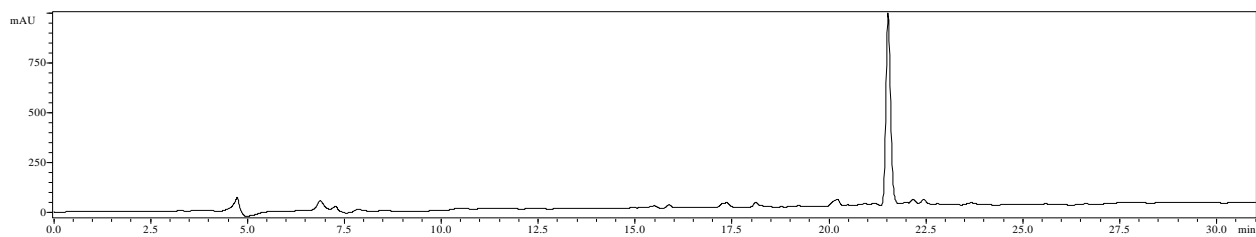

MS (MALDI-TOF)  $m/z$  965  $[M+Na]^+$

Acquisition method name D:\Methods\flexControlMethods\RP\_0-6kDa\_  
nov11.par

Sample name (file name prefix) 2g b

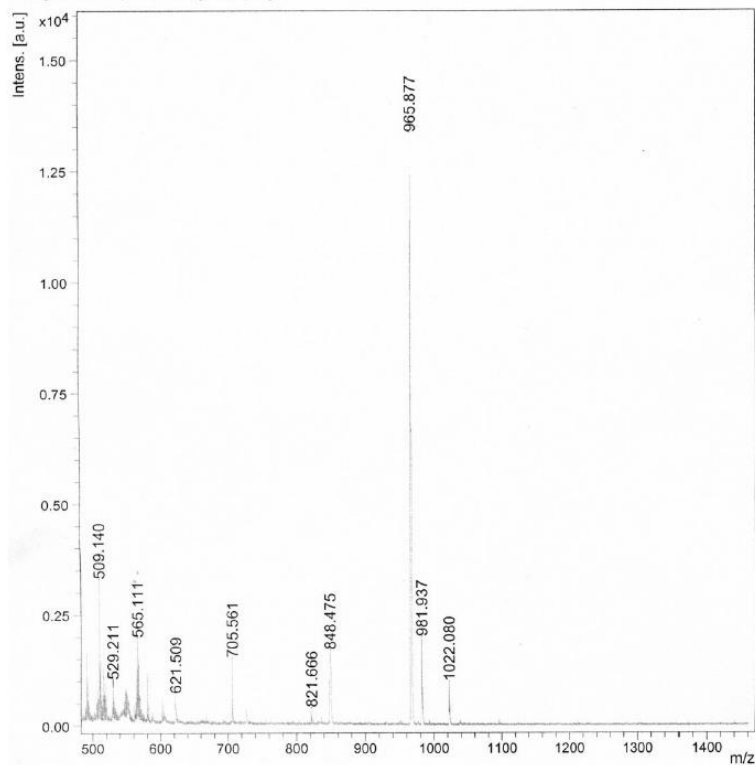

Date of acquisition 2012-04-24 13:51:56  
Comment 3  
Deflection on/off true  
Deflection pulser mass 200.00000000000000  
Instrument type autolex  
PIE delay in [ns] 190.00000000000000 n  
Reflector - lens binding value 0.0000000000000000  
Reflector - lens binding false  
Laser beam attenuation 46.00000000000000  
Voltage polarity POS  
Laser repetition rate in Hz 2.0000000000000000 p  
Ion source voltage 1 20.000000000000000  
Ion source voltage 2 17.500000000000000  
Ion source lens voltage 7.099999999999999  
Number of shots 100

04/24/12

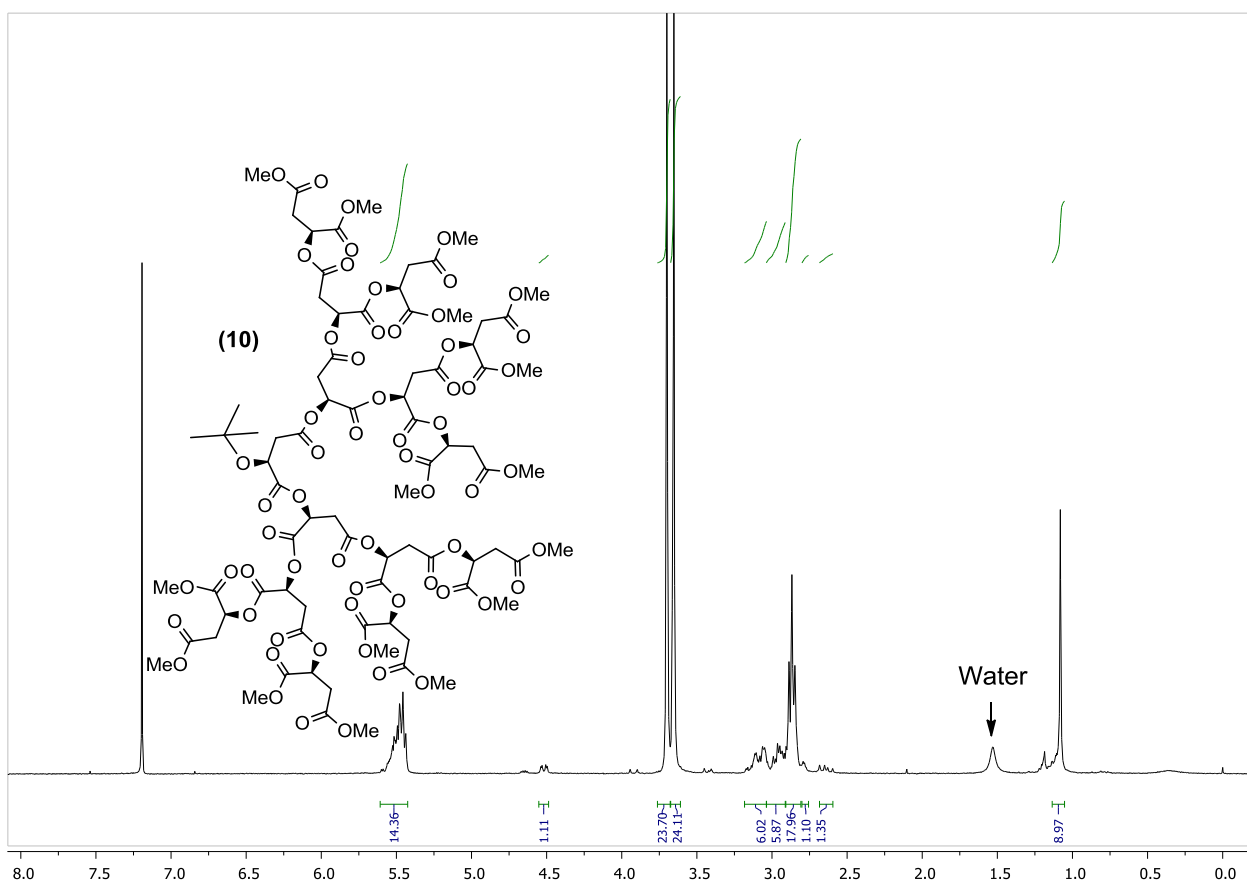

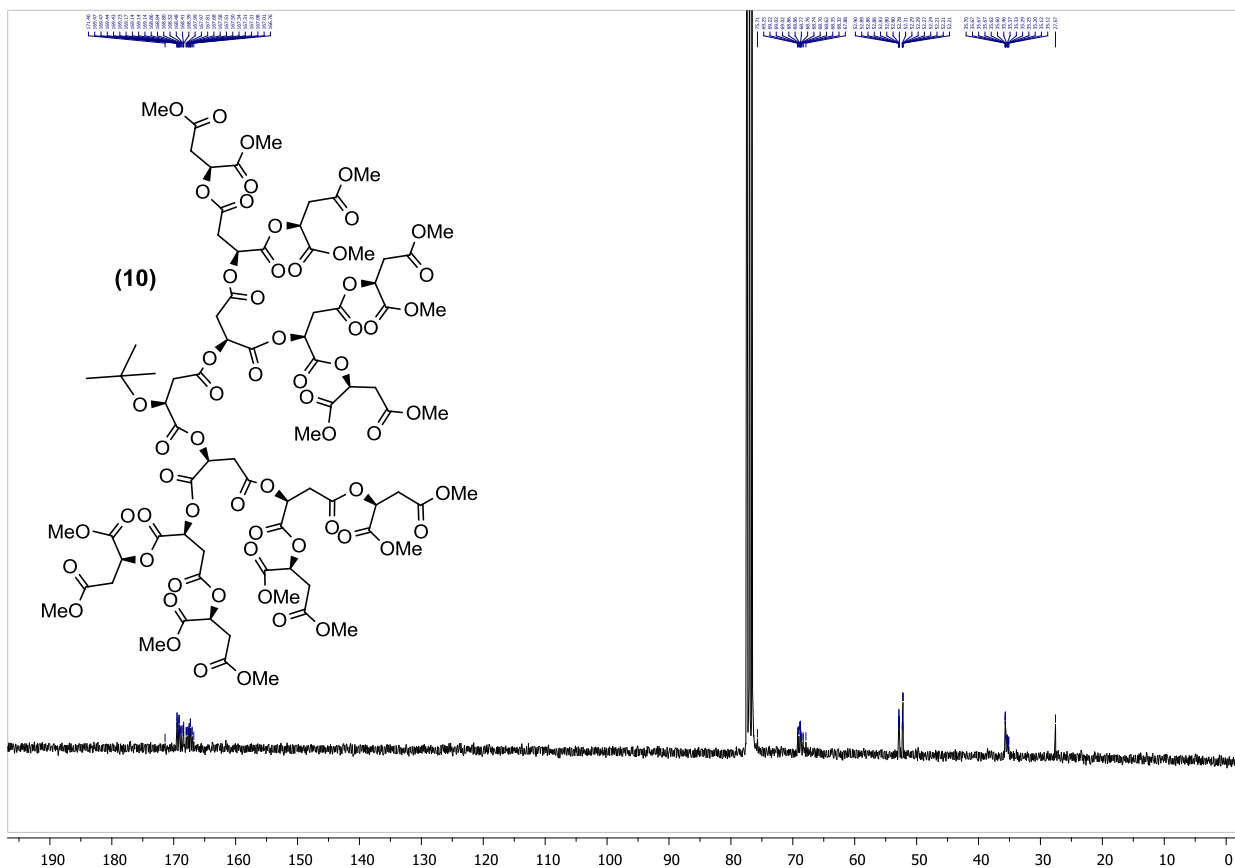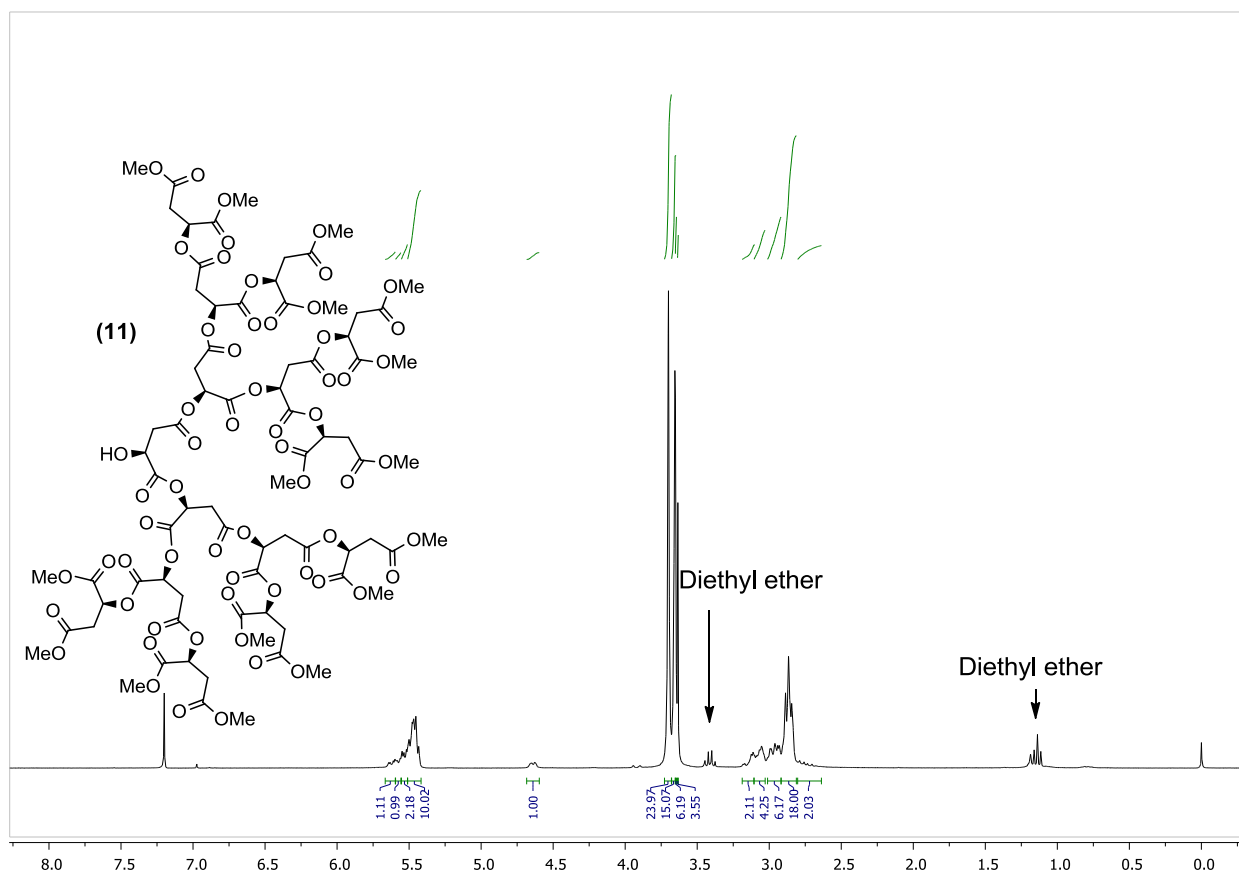



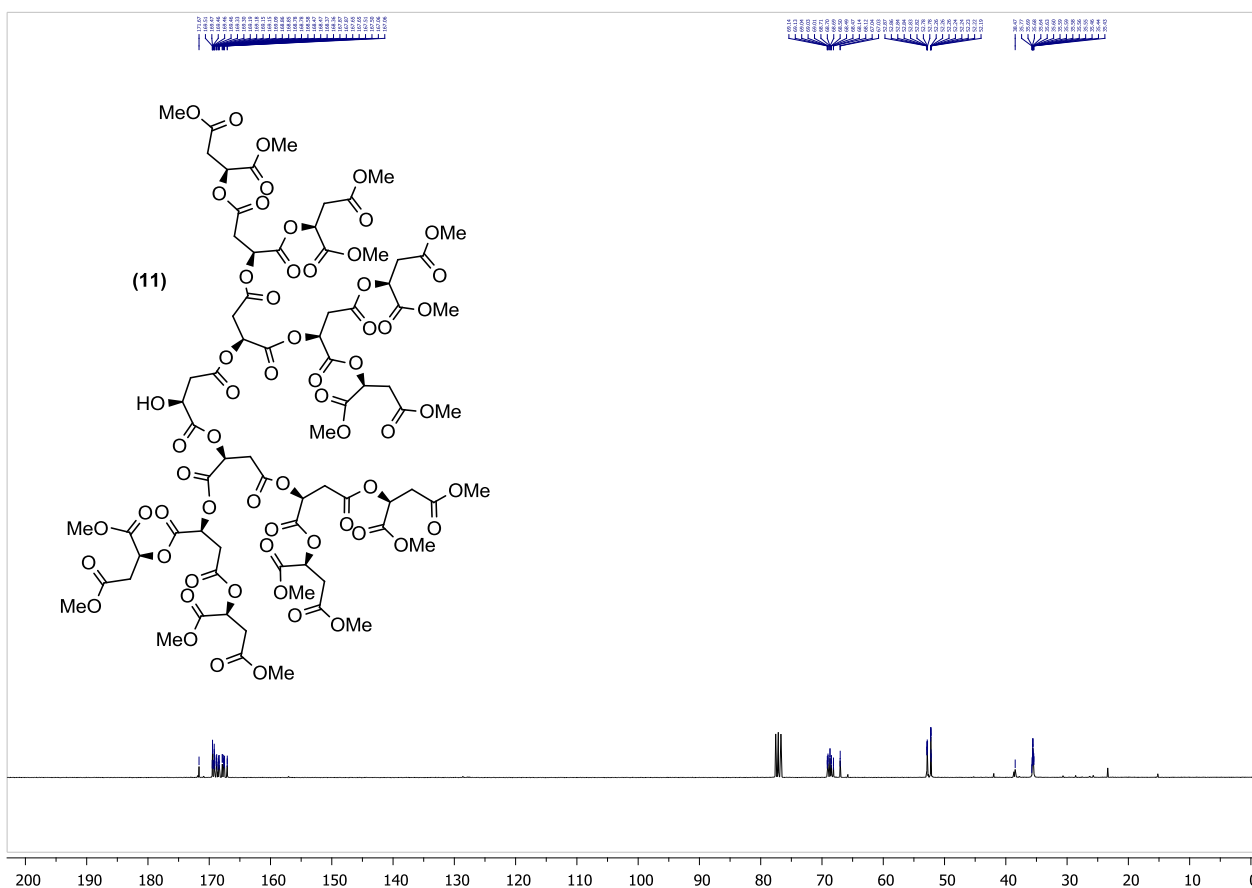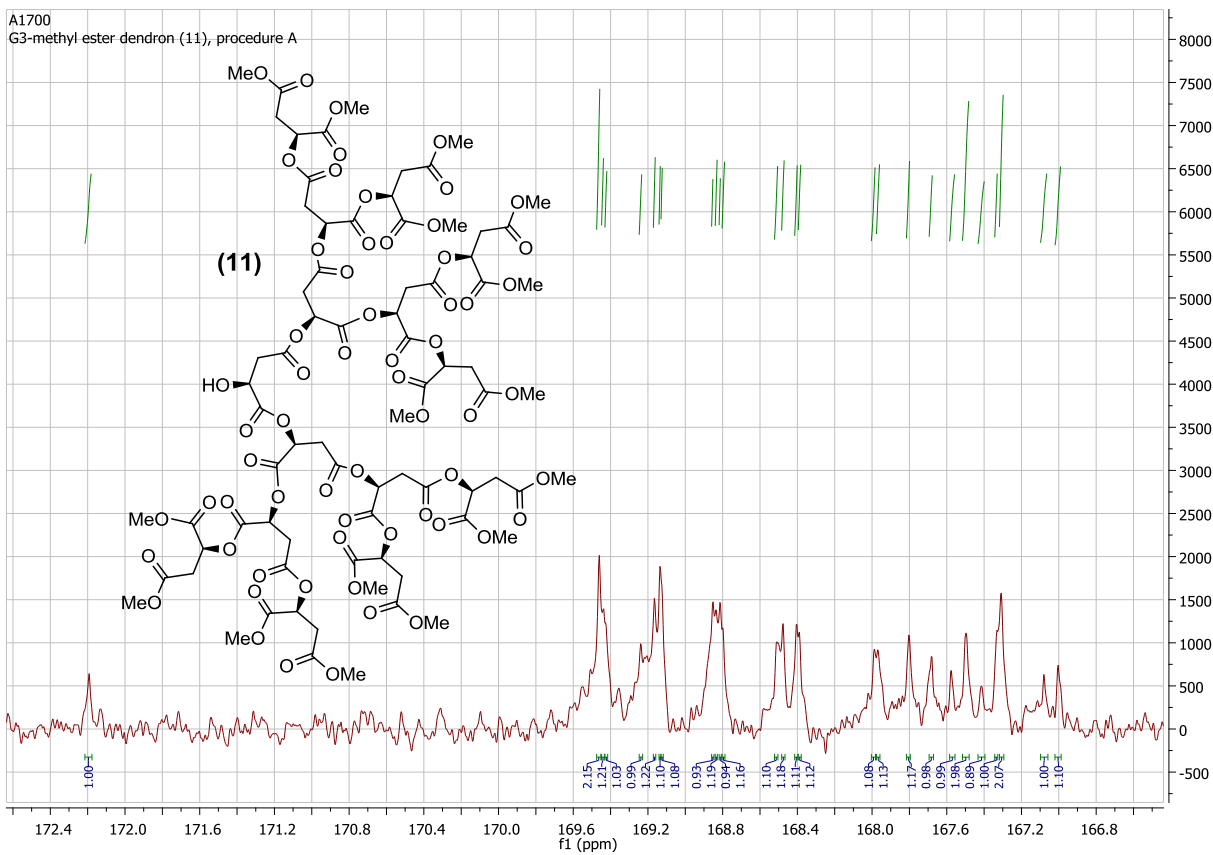

HPLC (reversed phase) and MS (MALDI-TOF) of **(11)**

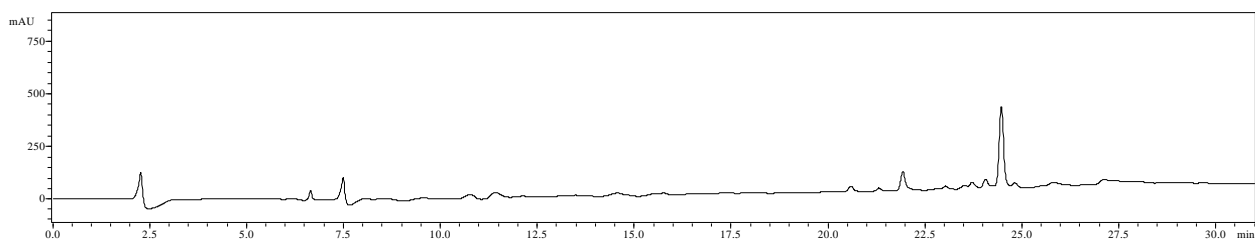

MALDI-TOF MS (calc): 1982.43, found: 2006.8 (M+Na)

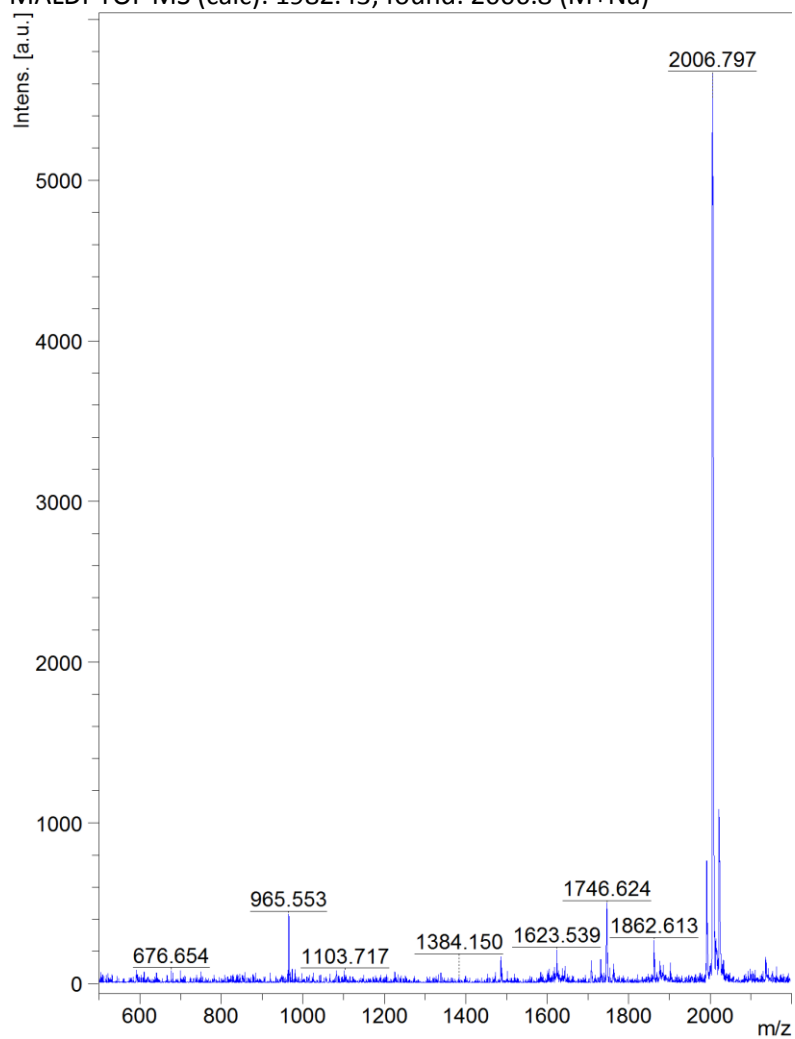

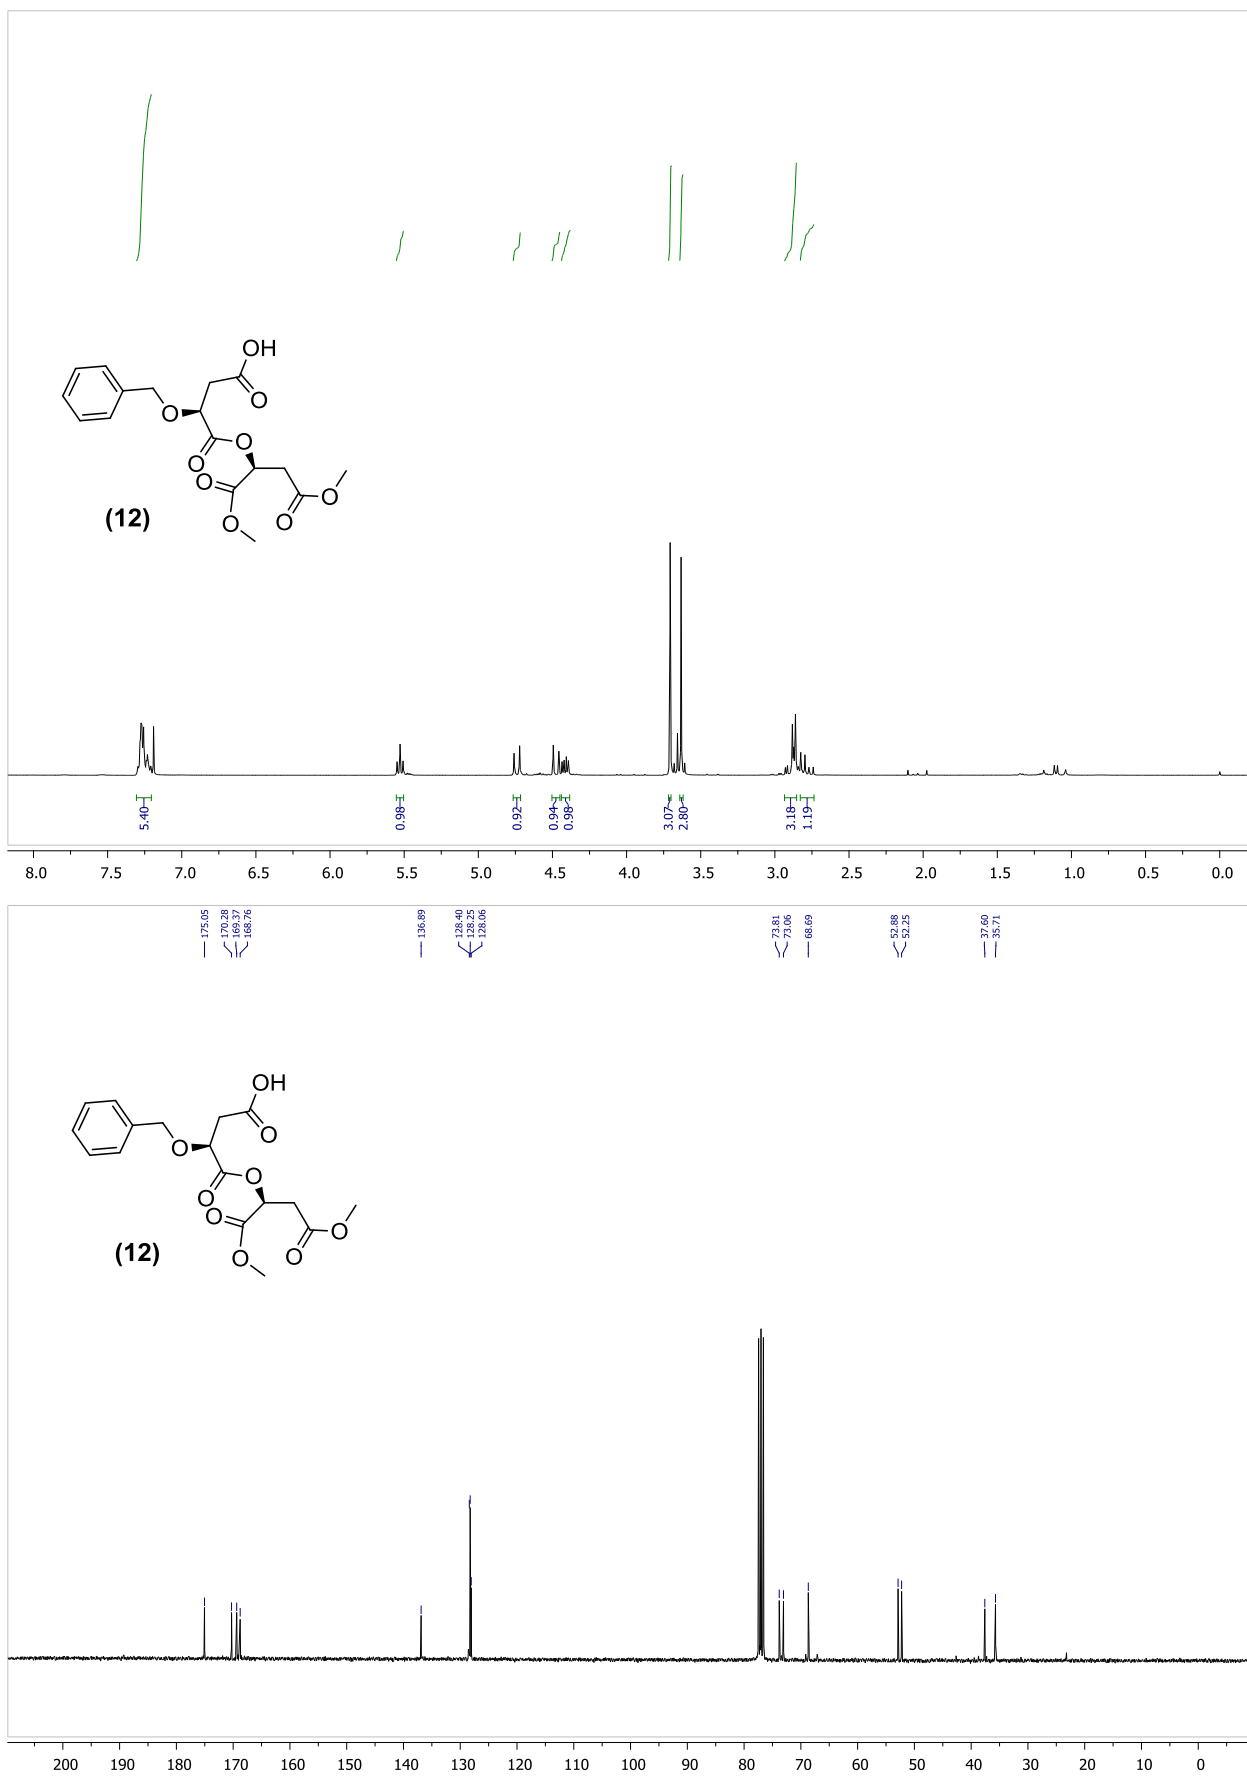

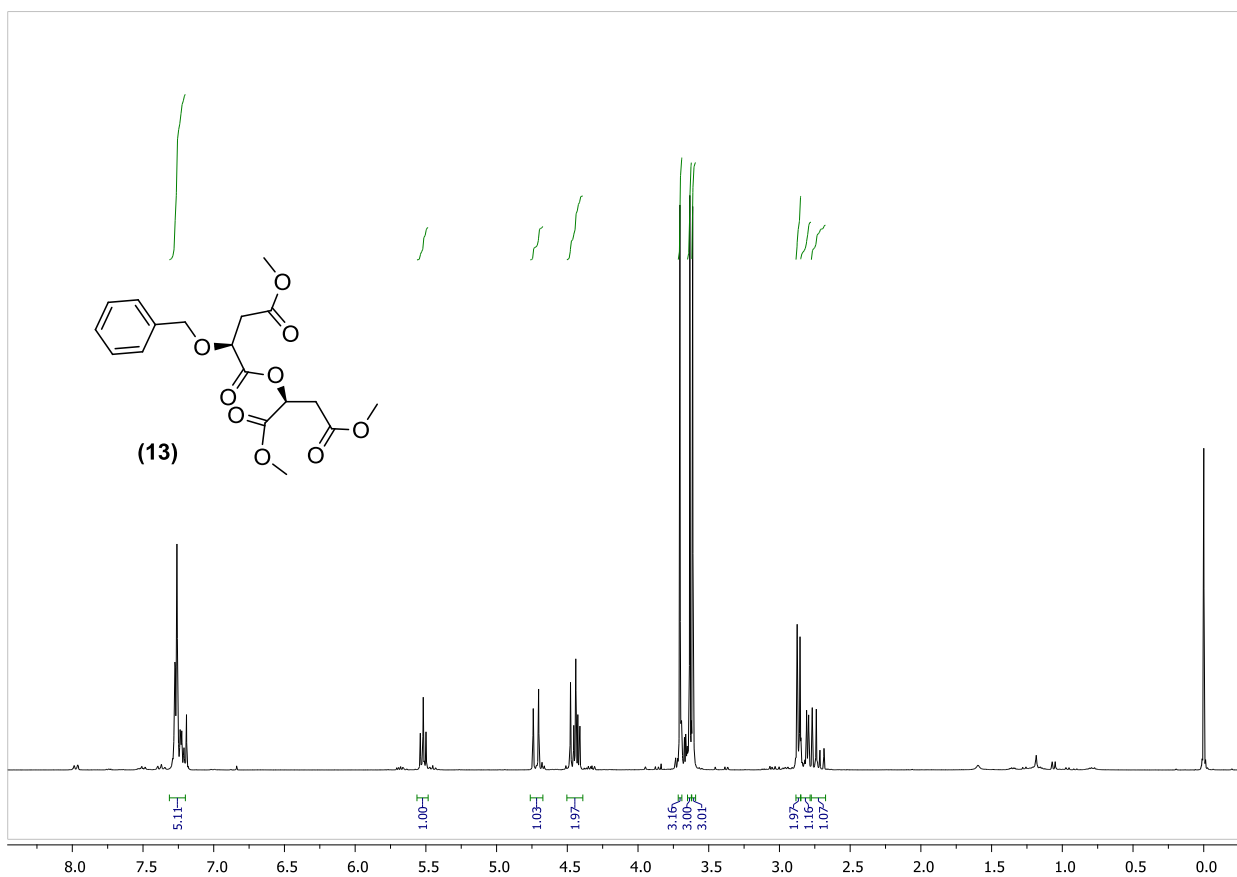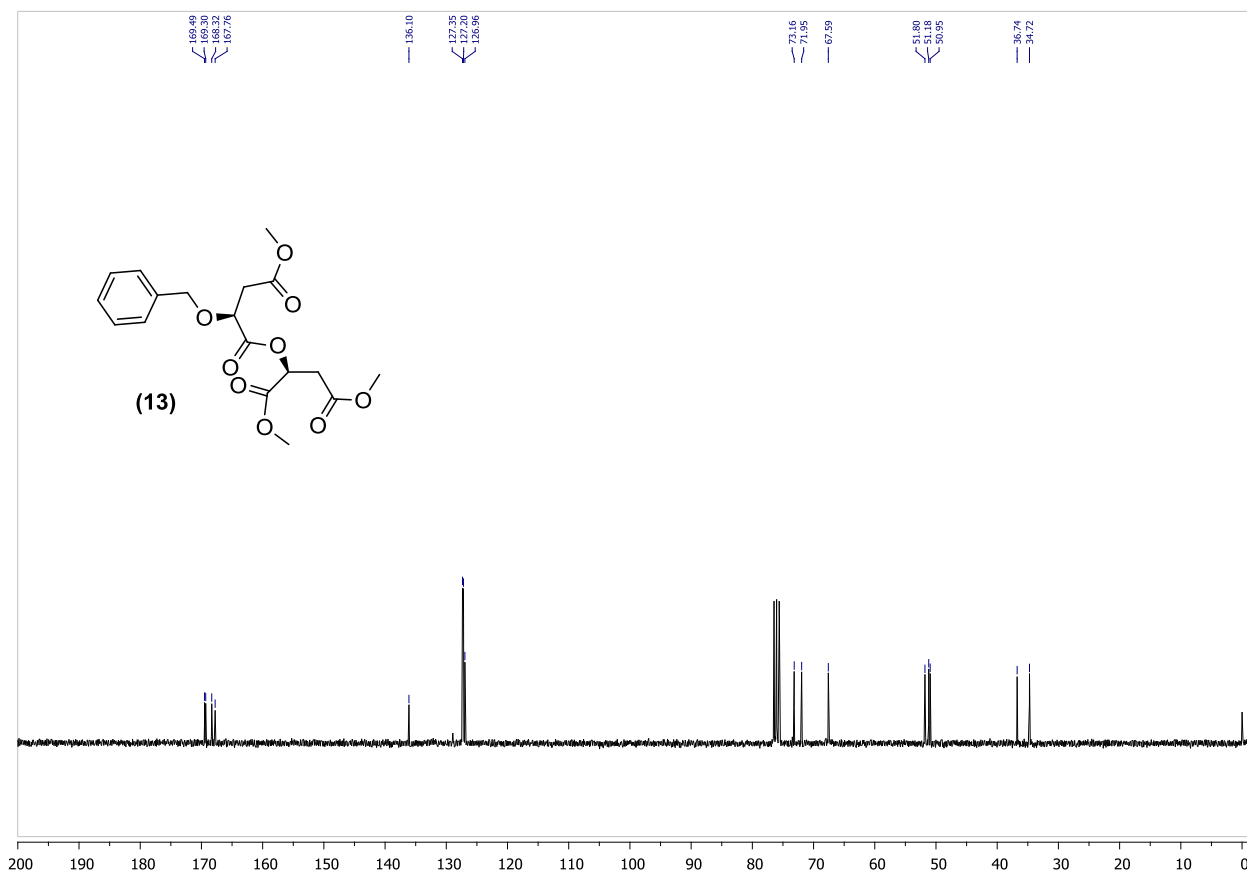

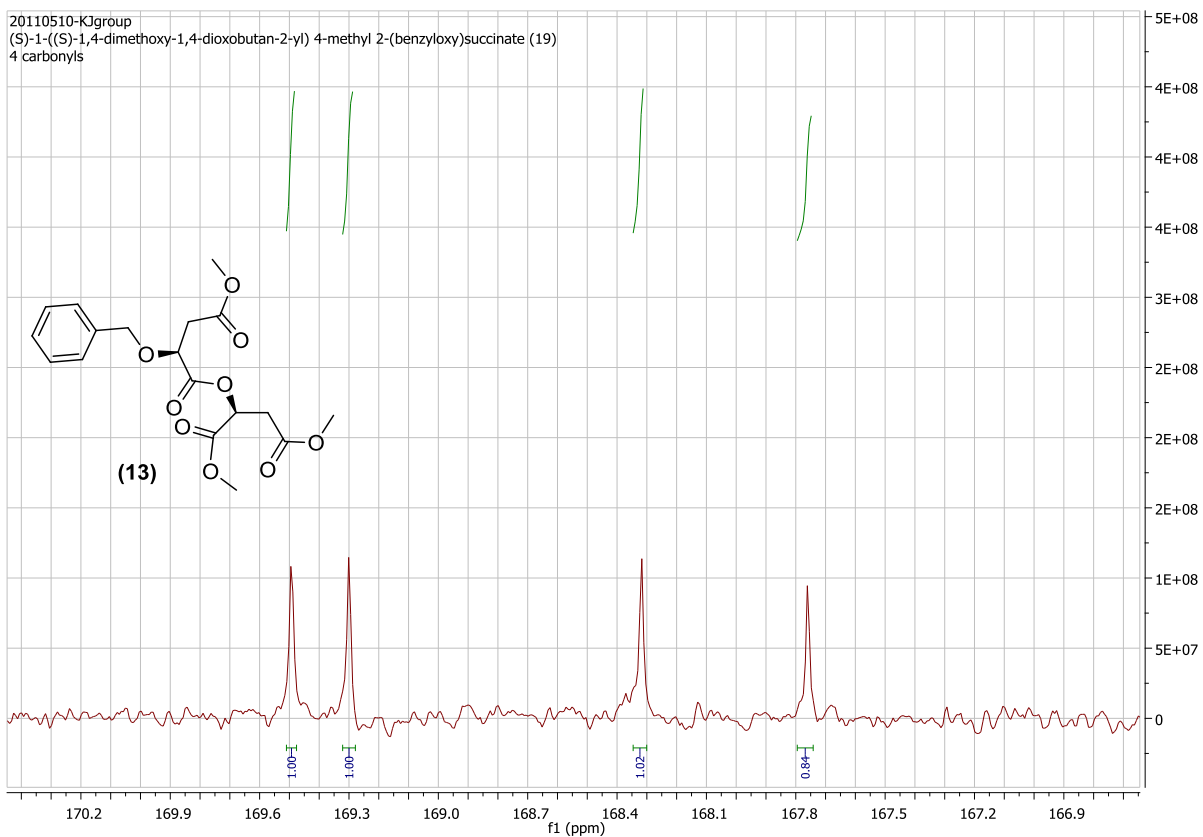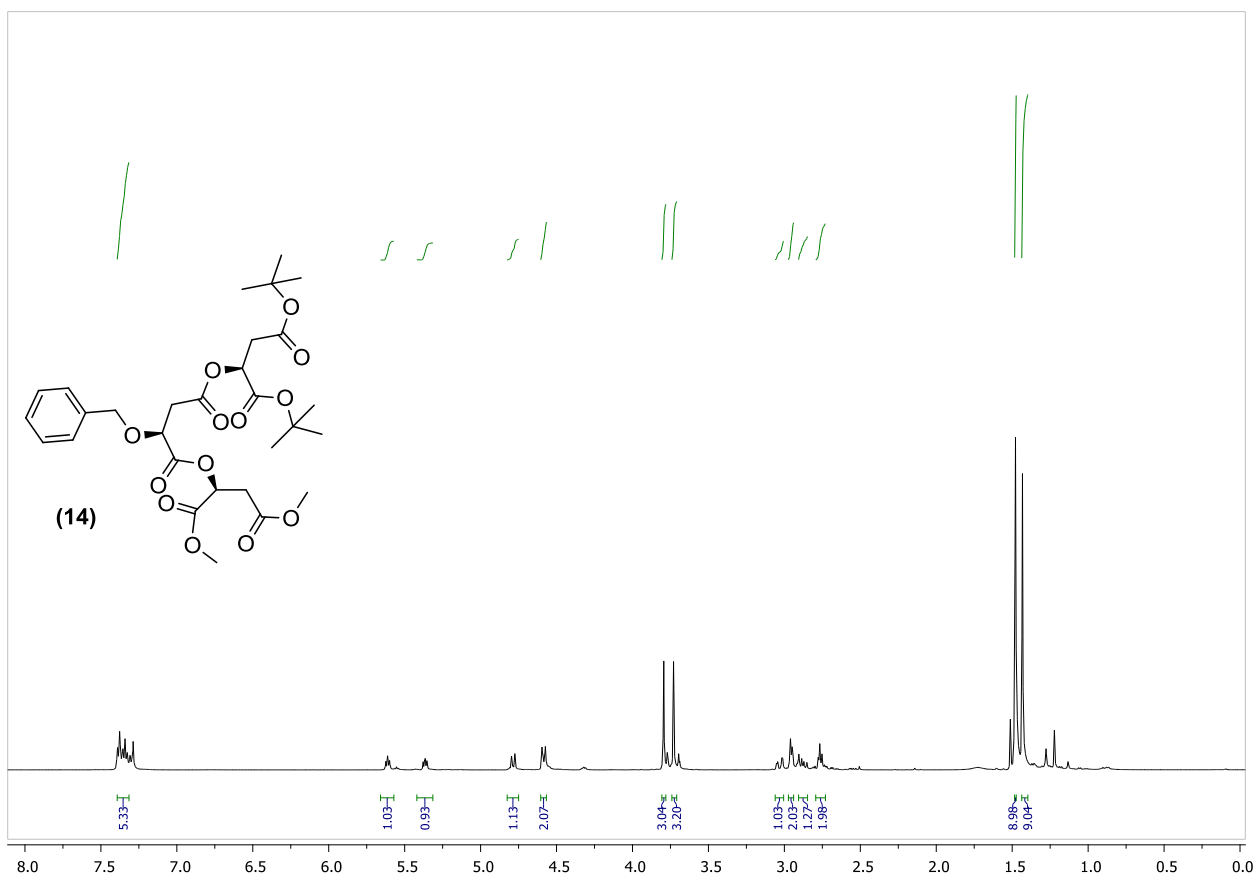

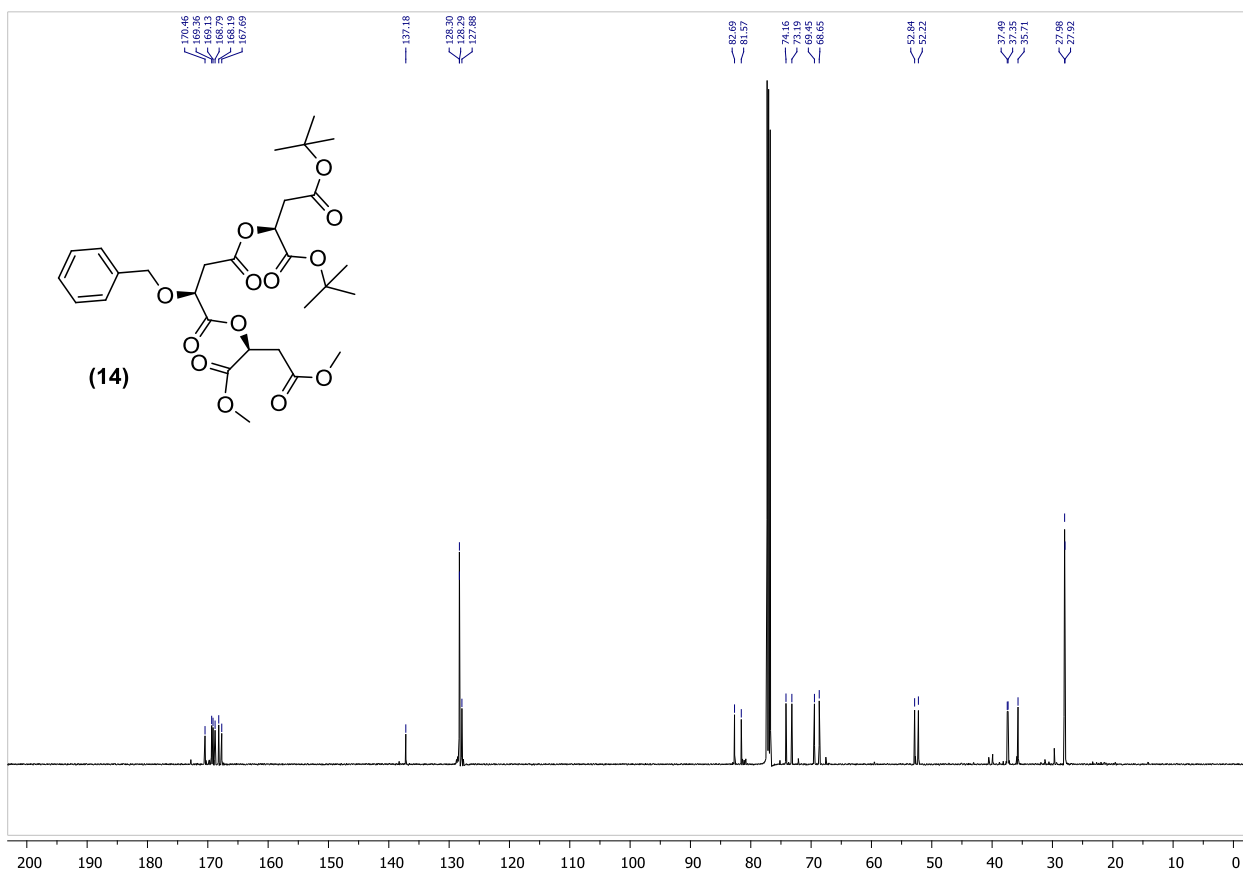

### HPLC (reversed-phase) and MS of (14)

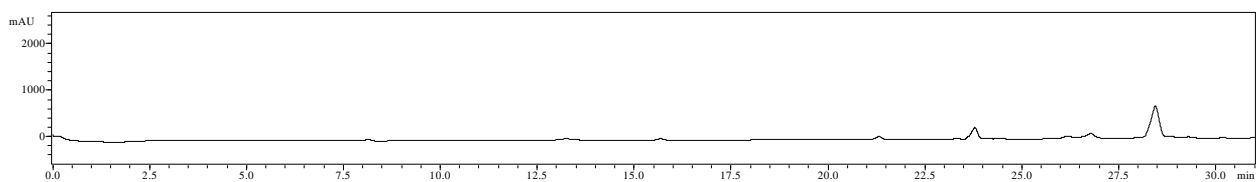

HRMS (ESI+)  $[M+Na]^+$  calculated for  $[C_{29}H_{40}NaO_{13}]^+$  619.2361, found 619.2361.

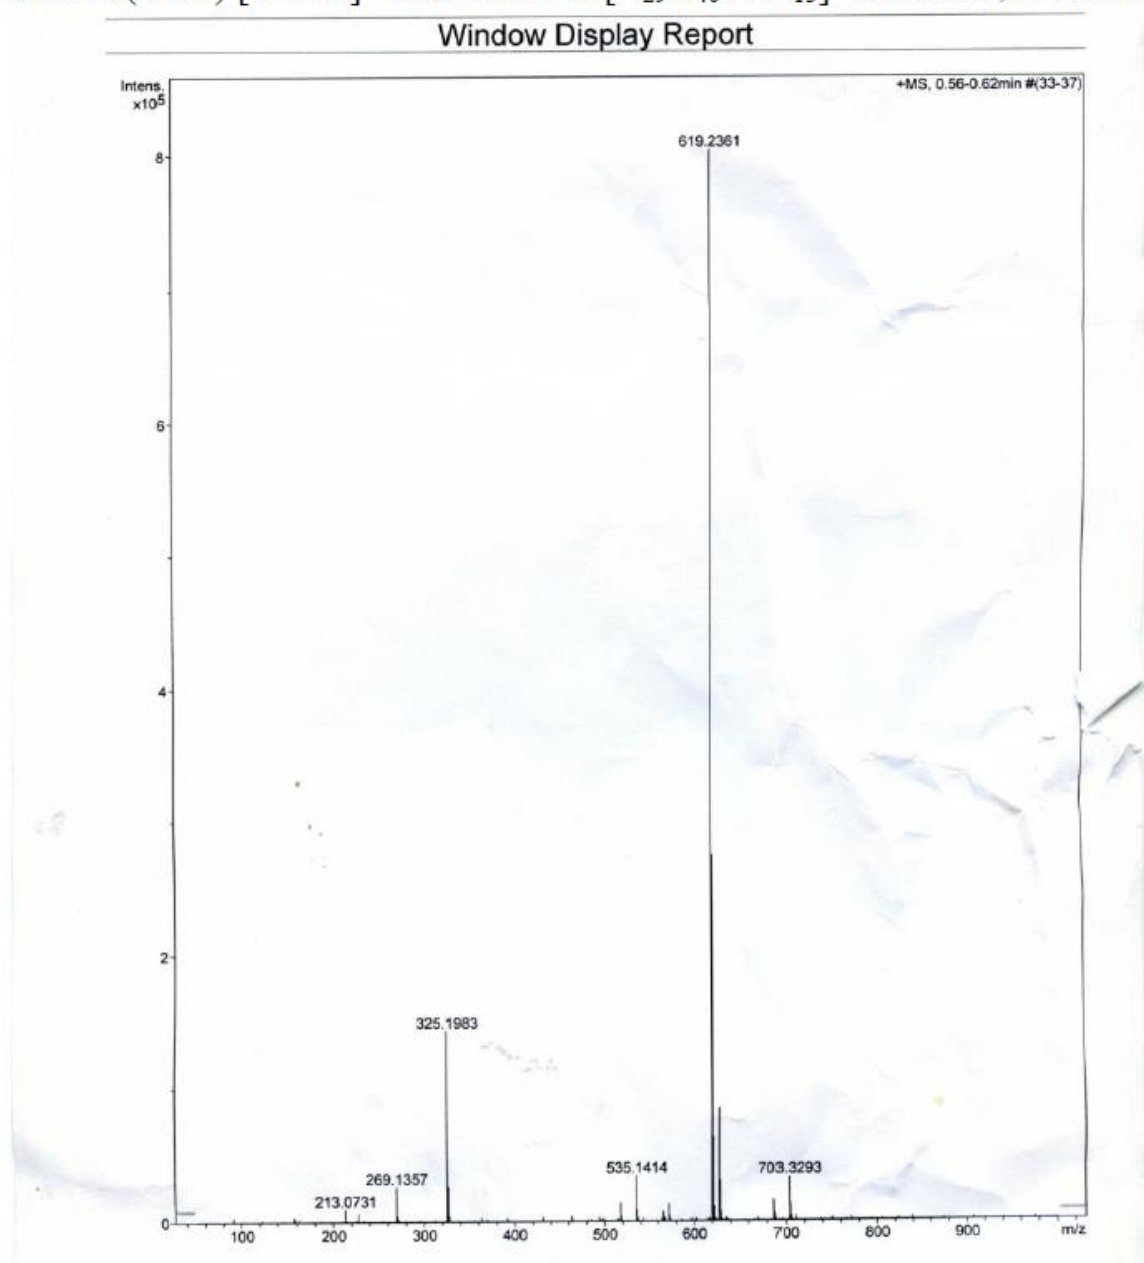

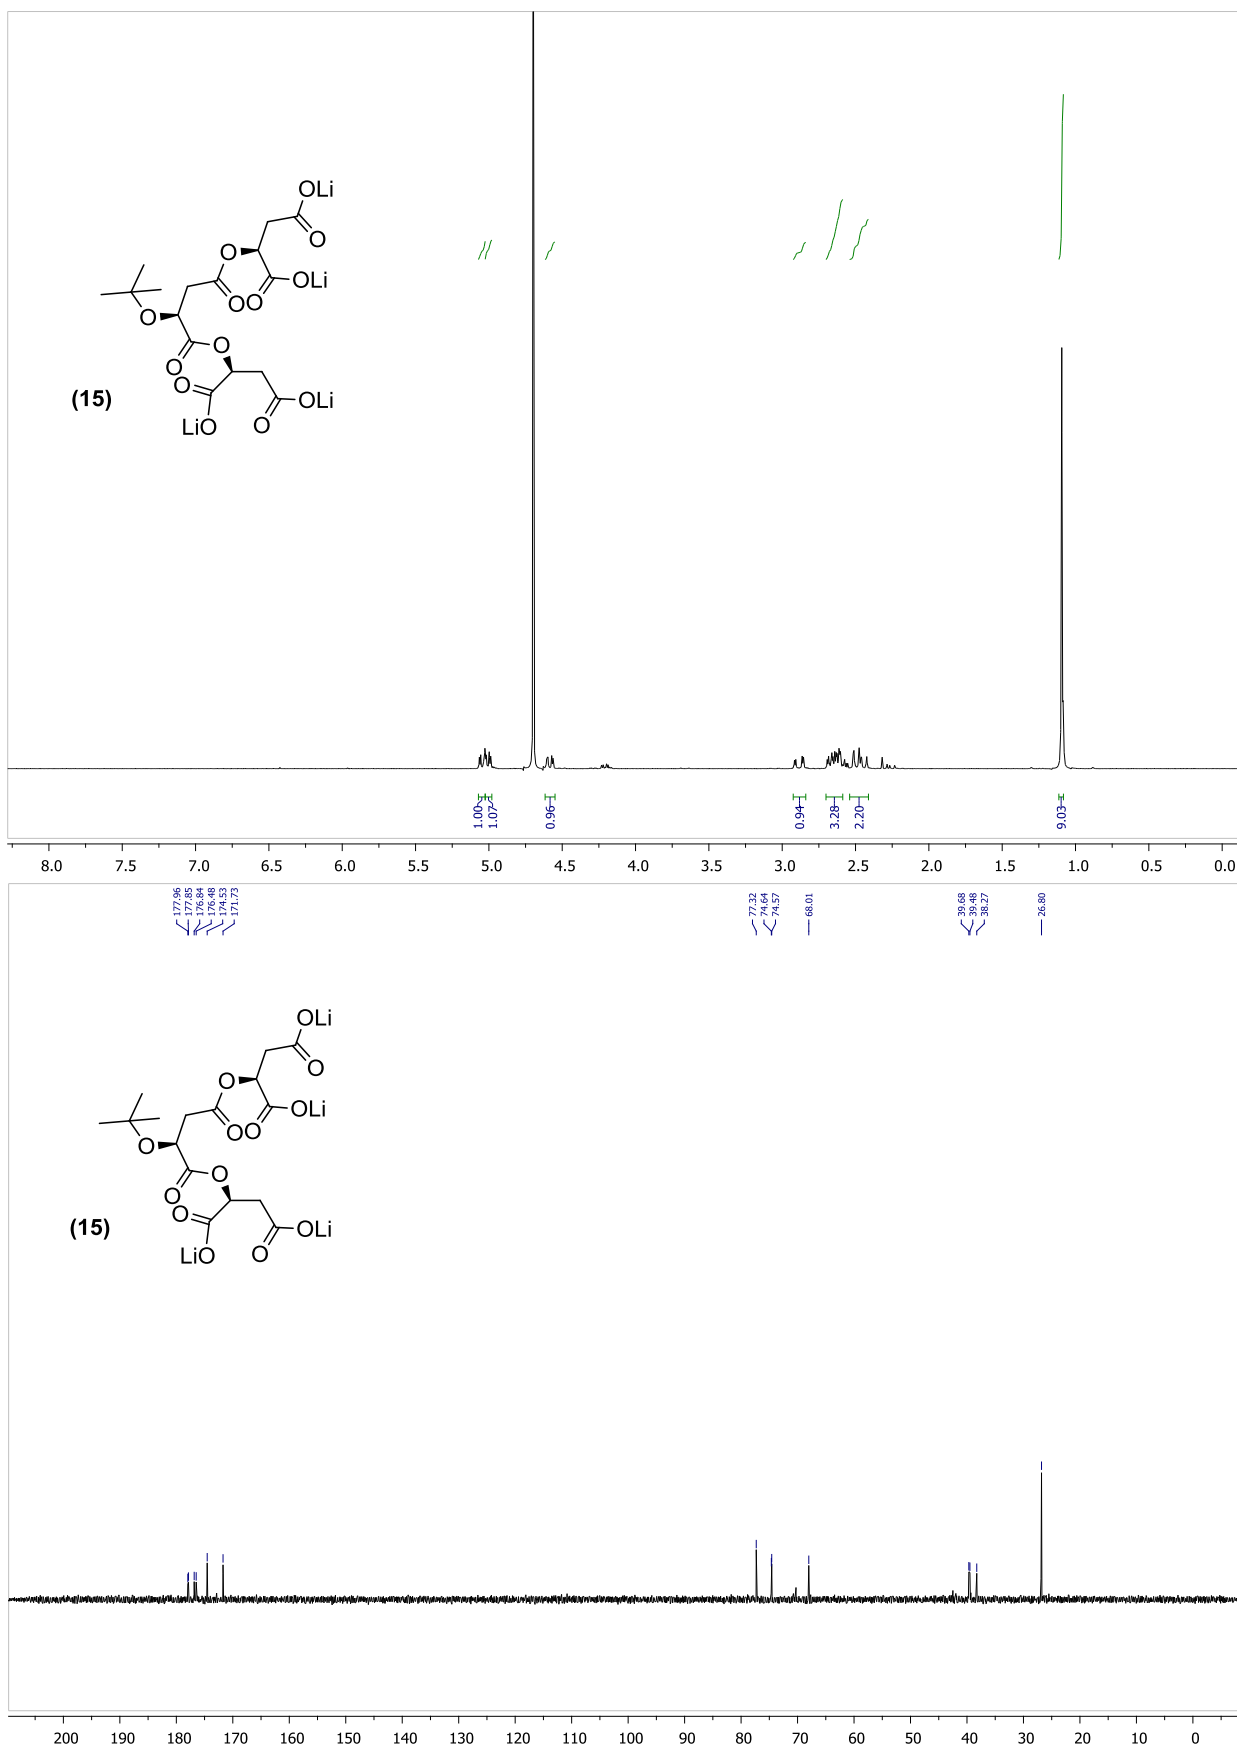



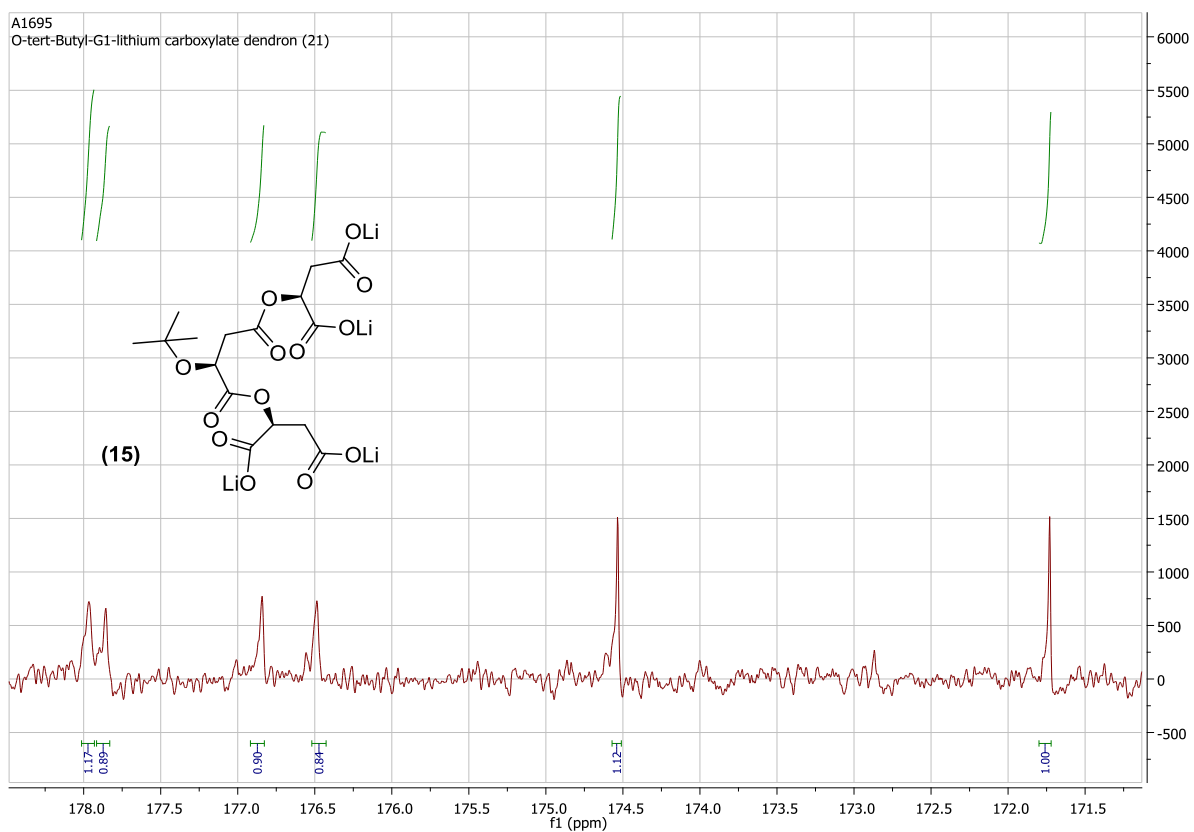

HPLC (reversed-phase, protonated compound) and MS of (15)

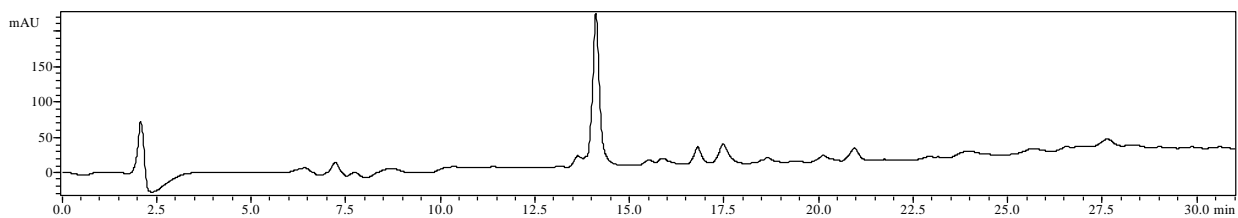

HRMS (ESI<sup>+</sup>) (protonated with TFA) [M+Li]<sup>+</sup> calculated for [C<sub>16</sub>H<sub>22</sub>LiO<sub>13</sub>]<sup>+</sup> 429.1215, found 429.1212.

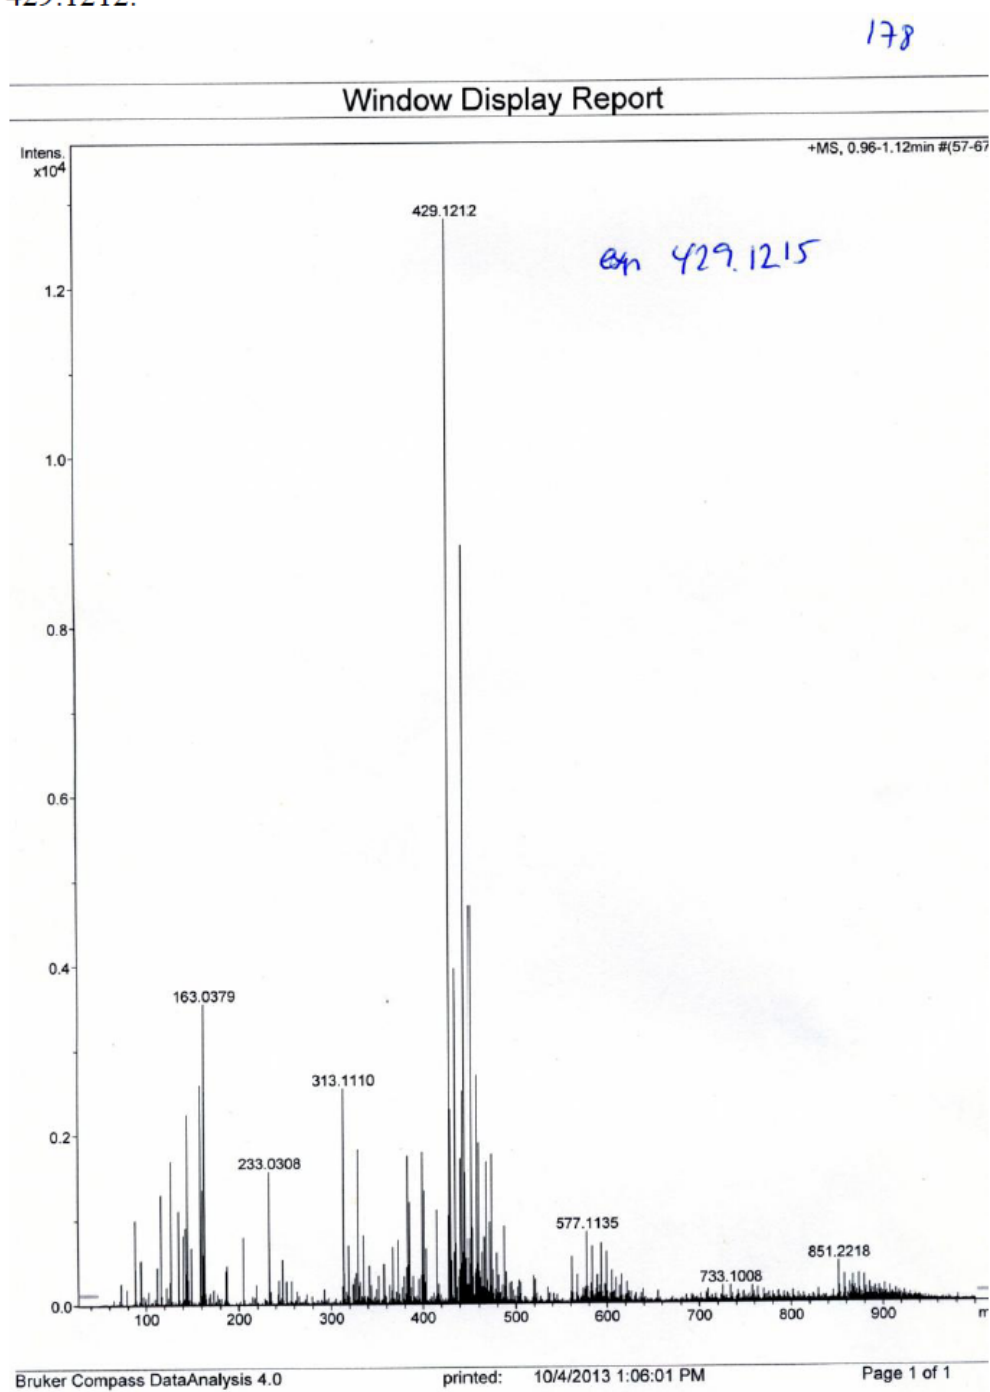

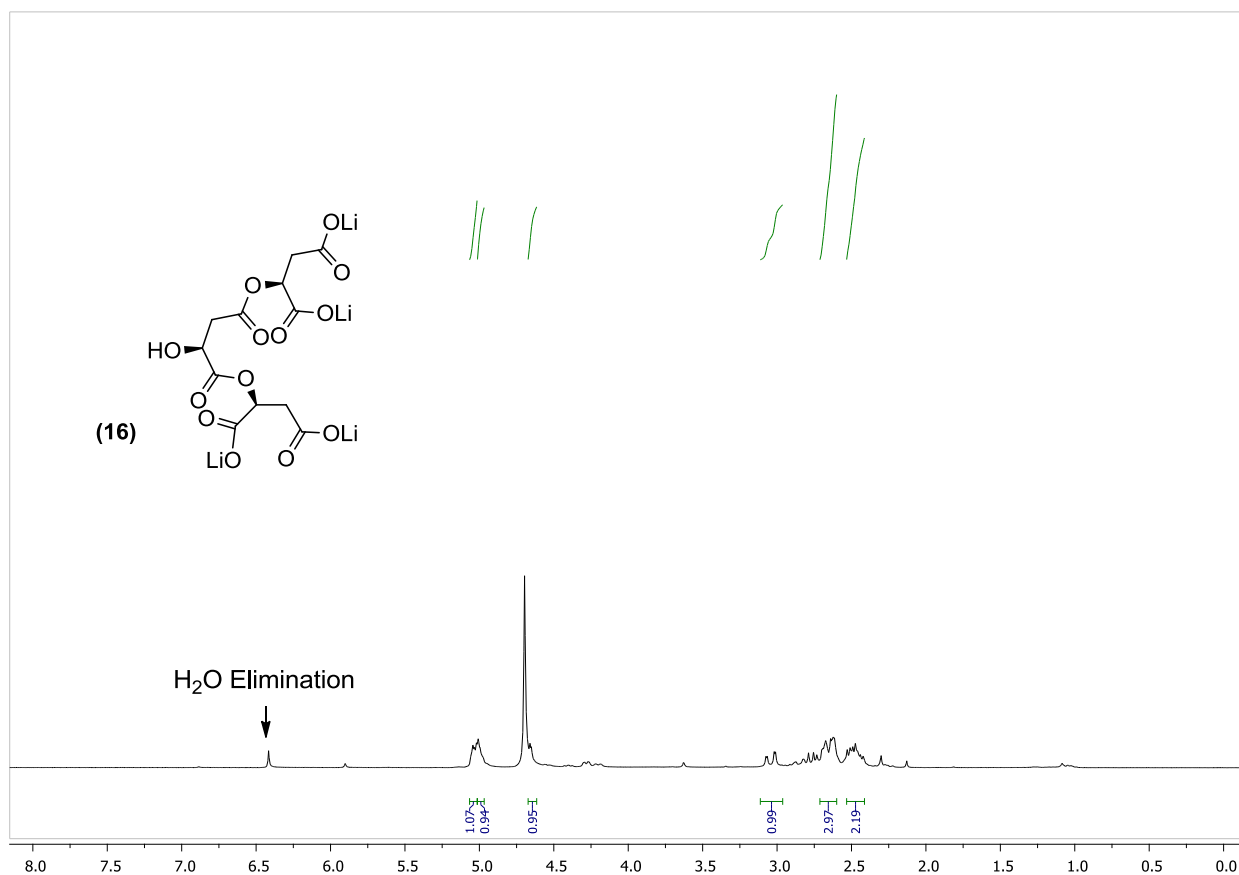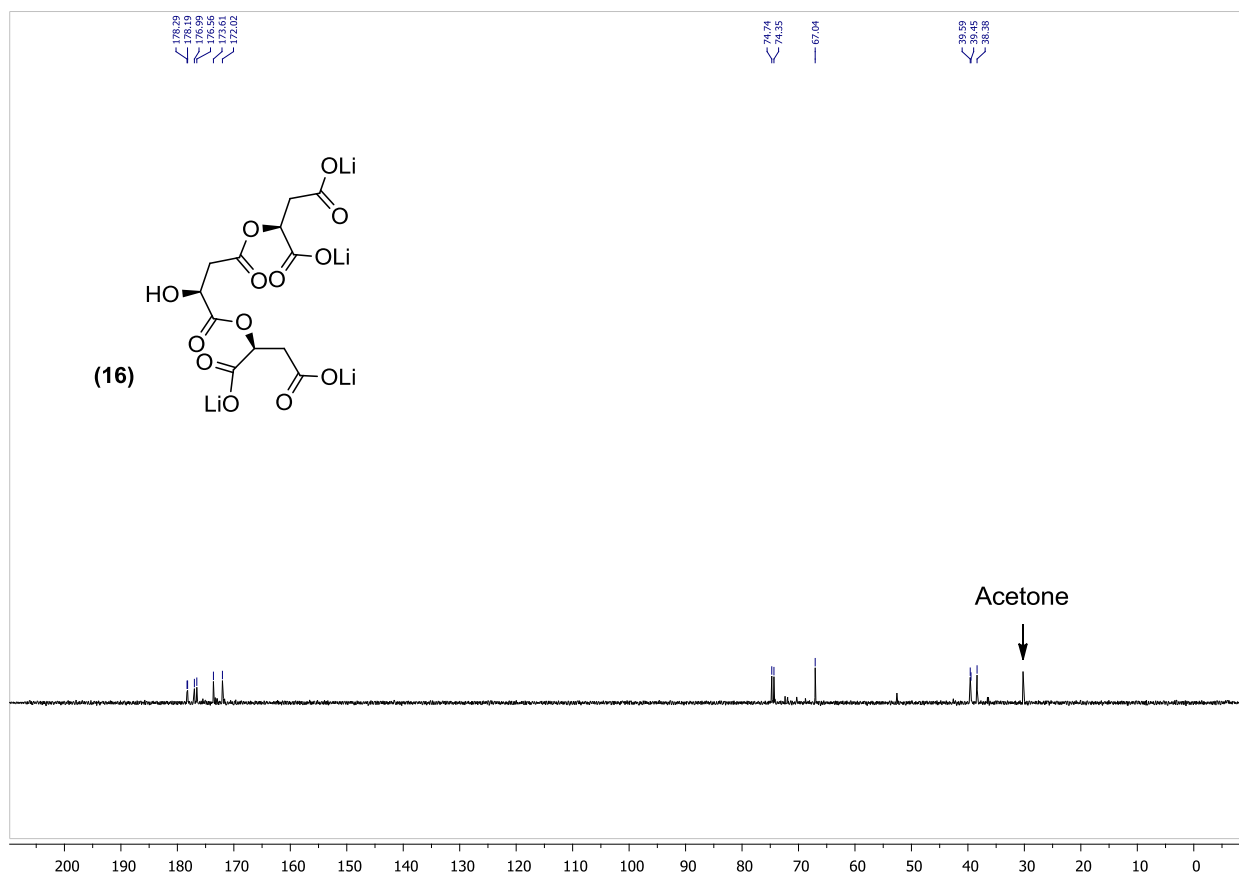

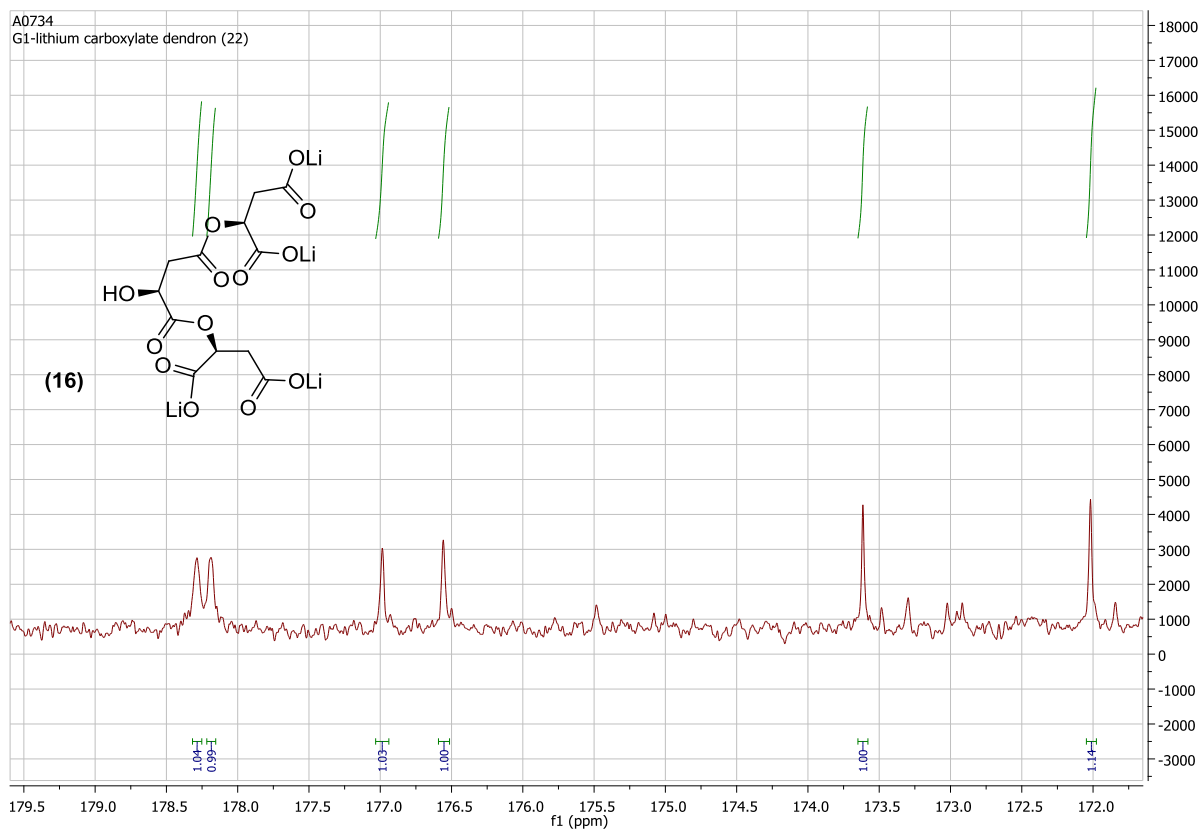

HPLC (reversed-phase, protonated form) and MS of (16)

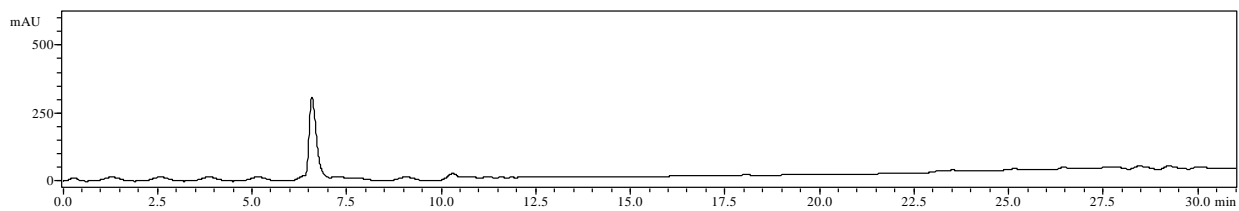

HRMS (ESI+) (protonated with TFA)  $[M+Li]^+$  calculated for  $C_{12}H_{14}LiO_{13}^+$  373.0589, found 373.0586.

177

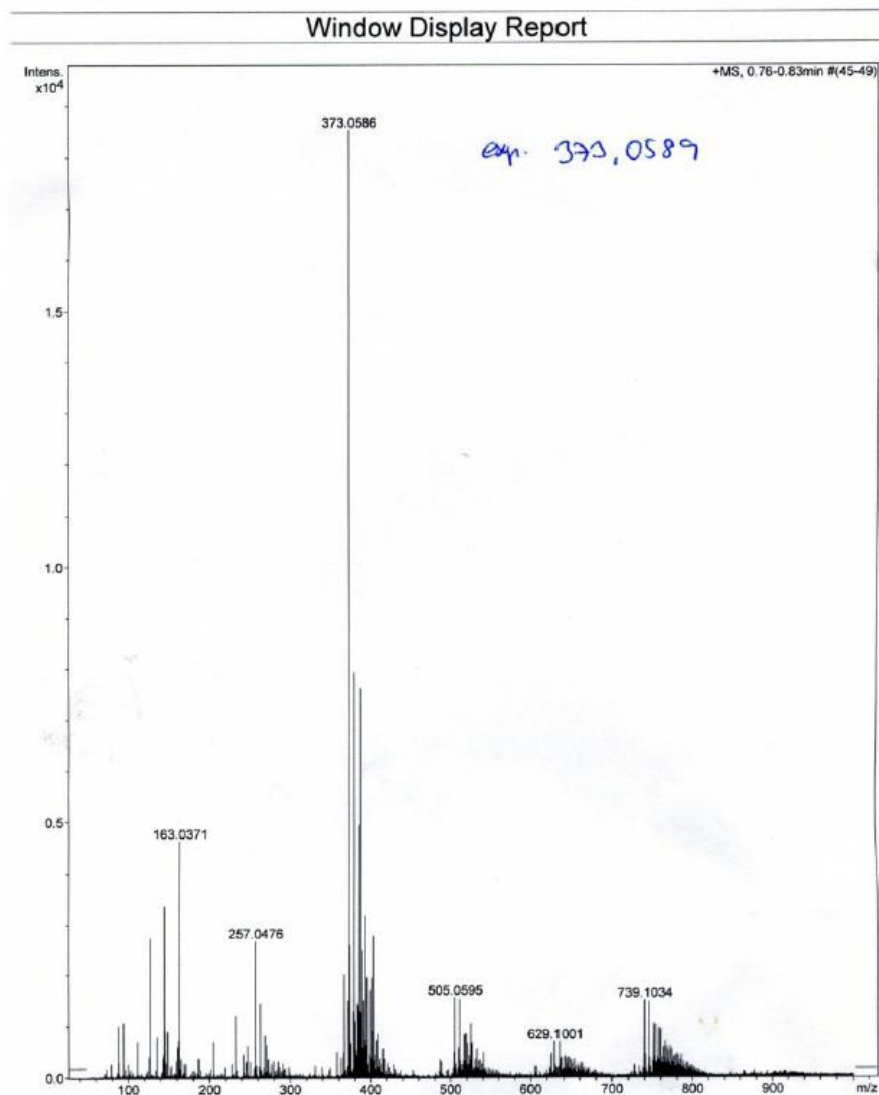

**Assigned HMBC-NMR for (S)-1-((S)-1,4-dimethoxy-1,4-dioxobutan-2-yl) 4-methyl 2-(benzyloxy)succinate (13):**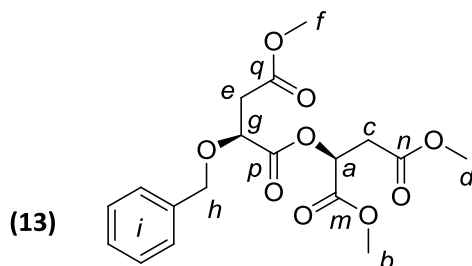

$^1\text{H}$  NMR (300 MHz,  $\text{CDCl}_3$ ,  $\delta$  in ppm)  $\text{H}_i$  7.54 – 7.02 (m, 5H),  $\text{H}_a$  5.52 (t,  $J = 6.1$  Hz, 1H),  $\text{H}_h$  4.72 (d,  $^1J = 11.3$  Hz, 1H),  $\text{H}_g$  4.46 (d,  $^1J = 11.2$  Hz, 1H),  $\text{H}_g$  4.43 (dd,  $J = 8.6, 4.3$  Hz, 1H),  $\text{H}_b$  3.70 (s, 3H),  $\text{H}_d$  3.63 (s, 3H),  $\text{H}_f$  3.61 (s, 3H),  $\text{H}_c$  2.86 (d,  $J = 6.1$  Hz, 2H),  $\text{H}_e$  2.83 (dd,  $^1J = 16.3, 4.2$  Hz, 1H), 2.73 (dd,  $^1J = 16.3, 8.7$  Hz, 1H).

$^{13}\text{C}$  NMR (75 MHz,  $\text{CDCl}_3$ ,  $\delta$  in ppm) HMBC

$\text{C}_q$  169.49  $^3J_{\text{H}_f-\text{C}_q}$  (3.61, 169.49),  $^2J_{\text{H}_e-\text{C}_q}$  (2.73 & 2.83, 169.49),  $^3J_{\text{H}_g-\text{C}_q}$  (4.43, 169.49)

$\text{C}_p$  169.30  $^2J_{\text{H}_g-\text{C}_p}$  (2.86, 169.30),  $^3J_{\text{H}_a-\text{C}_p}$  (5.52, 169.30),  $^3J_{\text{H}_e-\text{C}_n}$  (2.73 & 2.83, 169.30),  $^4J_{\text{H}_c-\text{C}_p}$  (2.86, 169.30)

$\text{C}_n$  168.32  $^3J_{\text{H}_d-\text{C}_n}$  (3.63, 168.32),  $^2J_{\text{H}_c-\text{C}_n}$  (2.86, 168.32),  $^3J_{\text{H}_a-\text{C}_n}$  (5.52, 168.32)

$\text{C}_m$  167.76  $^3J_{\text{H}_b-\text{C}_m}$  (3.70, 167.76),  $^2J_{\text{H}_a-\text{C}_m}$  (5.52, 167.76),  $^3J_{\text{H}_c-\text{C}_m}$  (2.86, 167.76)

$\text{C}_i$  136.10, 127.35, 127.20, 126.96,  $^{2,4}J_{\text{H}_h-\text{C}_i}$  (4.72 & 4.46, 136.10 & ca. 126),  $^{1,4}J_{\text{H}_f-\text{C}_i}$  (7.54 – 7.02, 136.10 & ca. 127)

$\text{C}_g$  73.16  $^4J_{\text{H}_h-\text{C}_g}$  (4.72 & 4.46, 73.16),  $^1J_{\text{H}_g-\text{C}_g}$  (4.43, 73.16),  $^2J_{\text{H}_e-\text{C}_g}$  (2.83 & 2.73, 73.16)

$\text{C}_h$  71.95  $^1J_{\text{H}_h-\text{C}_h}$  (4.72 & 4.46, 71.95),  $^3J_{\text{H}_g-\text{C}_h}$  (4.43, 71.95),  $^4J_{\text{H}_e-\text{C}_h}$  (2.83 & 2.73, 71.95),  $^{3,4}J_{\text{H}_f-\text{C}_h}$  (7.54 – 7.02, 71.95)

$\text{C}_a$  67.59  $^4J_{\text{H}_b-\text{C}_a}$  (3.70, 67.59),  $^1J_{\text{H}_a-\text{C}_a}$  (5.52, 67.59),  $^2J_{\text{H}_c-\text{C}_a}$  (2.86, 67.59)

$\text{C}_b$  51.80  $^1J_{\text{H}_b-\text{C}_b}$  (3.70, 51.80)

$\text{C}_d$  51.18  $^1J_{\text{H}_d-\text{C}_d}$  (3.63, 51.18)

$\text{C}_f$  50.95  $^1J_{\text{H}_f-\text{C}_f}$  (3.61, 50.95)

$\text{C}_e$  36.74  $^4J_{\text{H}_f-\text{C}_e}$  (3.61, 36.74),  $^1J_{\text{H}_e-\text{C}_e}$  (2.73 & 2.86, 36.74),  $^2J_{\text{H}_g-\text{C}_e}$  (4.43, 36.74)

$\text{C}_c$  34.72  $^4J_{\text{H}_d-\text{C}_c}$  (3.63, 34.72),  $^1J_{\text{H}_c-\text{C}_c}$  (2.86, 34.72),  $^2J_{\text{H}_a-\text{C}_c}$  (5.52, 34.72)

**Assignment of diastereotopic protons in compound 6 and compound 13 by NMR to determine the epimerization extent:**

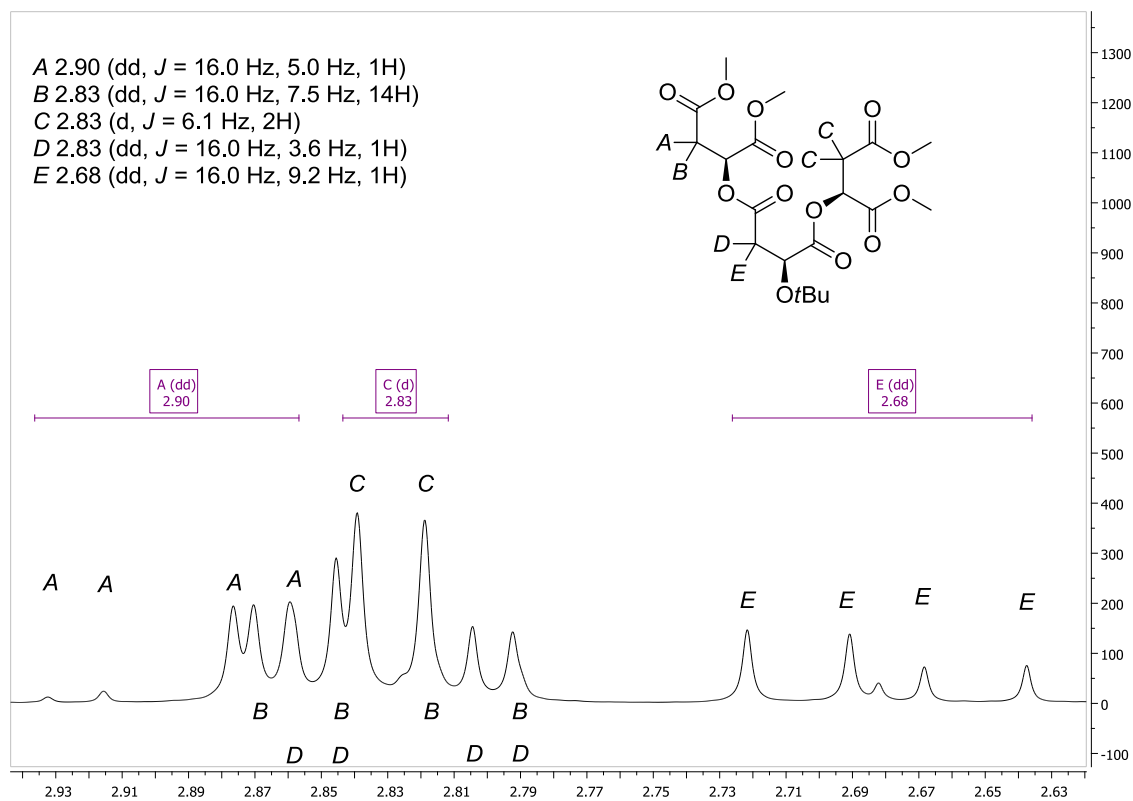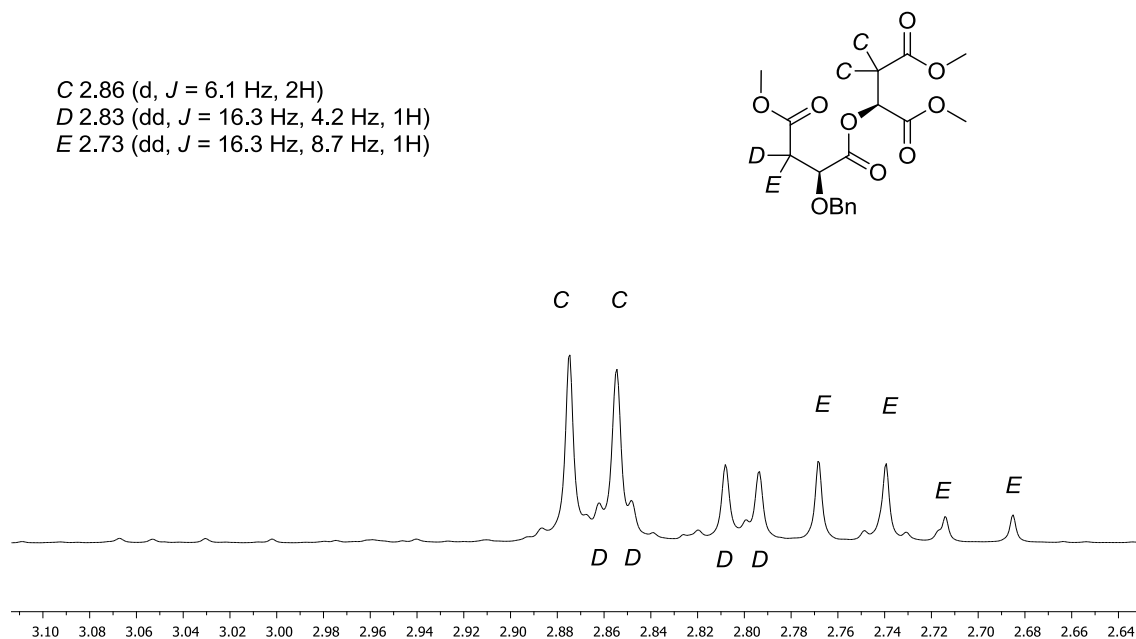

Degradation of G1-methyl ester dendron at pH 9 analyzed by NMR (HSQC and H,H-COSY).

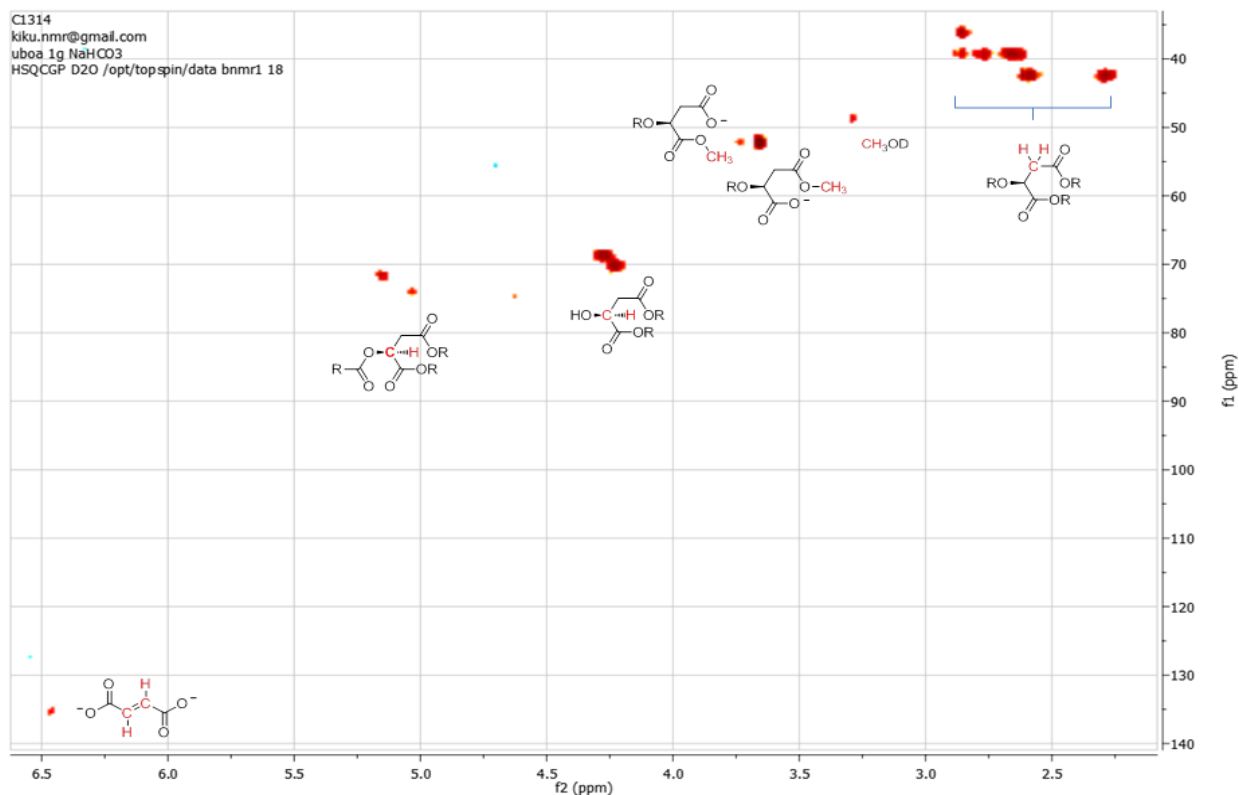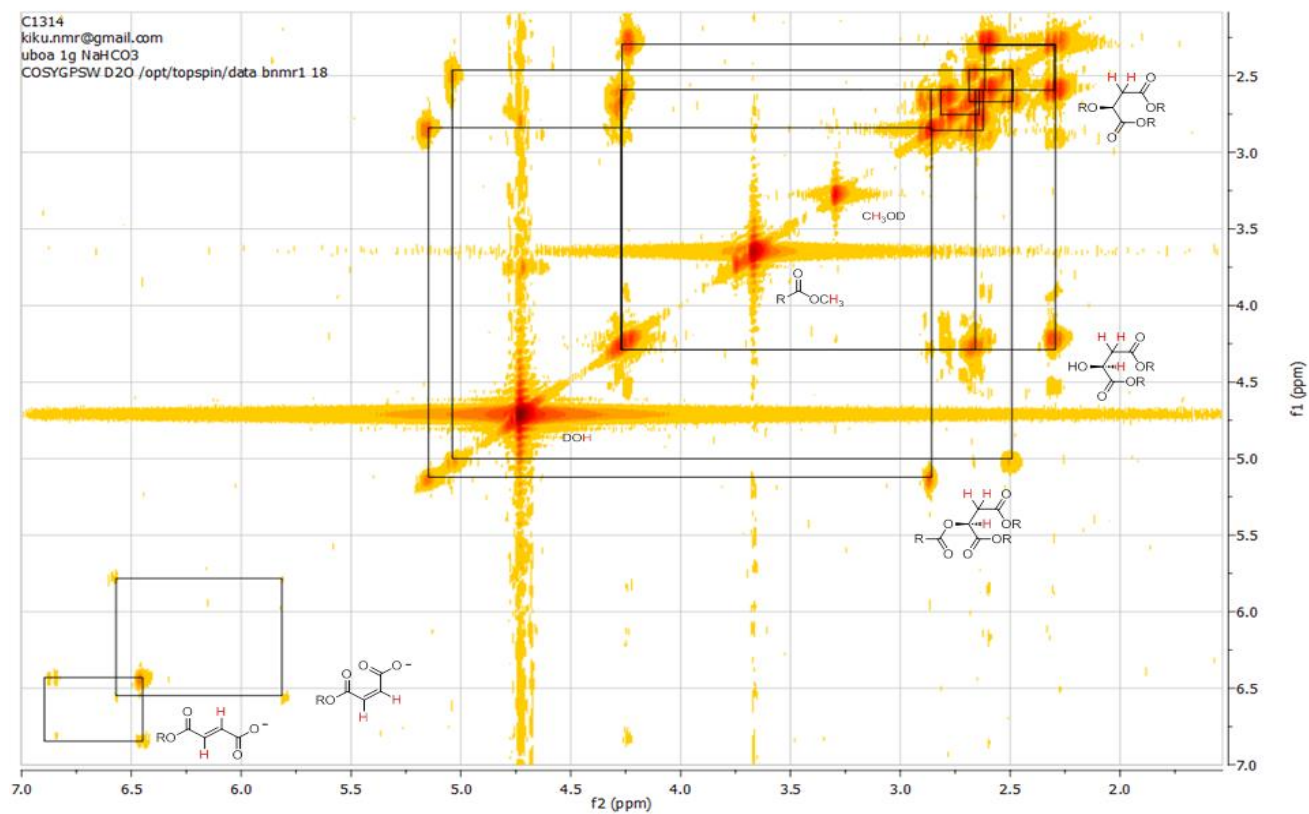

Supplement: c4nj01156b1.pdf [file c4nj01156b1.pdf]
